# Supplementary material for: What is the contribution of physician associates in hospital care in England? A mixed methods, multiple case study
Source: PubMed Central journal article supplement (PMC6359738; doi:10.1136/bmjopen-2018-027012), 2019-01-30
Supplement: bmjopen-2018-027012.draft_revisions.pdf [file bmjopen-2018-027012.draft_revisions.pdf]

# BMJ Open

BMJ Open is committed to open peer review. As part of this commitment we make the peer review history of every article we publish publicly available.

When an article is published we post the peer reviewers' comments and the authors' responses online. We also post the versions of the paper that were used during peer review. These are the versions that the peer review comments apply to.

The versions of the paper that follow are the versions that were submitted during the peer review process. They are not the versions of record or the final published versions. They should not be cited or distributed as the published version of this manuscript.

BMJ Open is an open access journal and the full, final, typeset and author-corrected version of record of the manuscript is available on our site with no access controls, subscription charges or pay-per-view fees (<http://bmjopen.bmj.com>).

If you have any questions on BMJ Open's open peer review process please email [editorial.bmjopen@bmj.com](mailto:editorial.bmjopen@bmj.com)

# BMJ Open

## WHAT IS THE CONTRIBUTION OF PHYSICIAN ASSOCIATES IN HOSPITAL CARE IN ENGLAND? A MIXED METHODS, MULTIPLE CASE STUDY.

|                               |                                                                                                                                                                                                                                                                                                                                                                                                                                                                                                                                                                                                                                                                                                                                                                                                                                                                                                                                                                           |
|-------------------------------|---------------------------------------------------------------------------------------------------------------------------------------------------------------------------------------------------------------------------------------------------------------------------------------------------------------------------------------------------------------------------------------------------------------------------------------------------------------------------------------------------------------------------------------------------------------------------------------------------------------------------------------------------------------------------------------------------------------------------------------------------------------------------------------------------------------------------------------------------------------------------------------------------------------------------------------------------------------------------|
| Journal:                      | <i>BMJ Open</i>                                                                                                                                                                                                                                                                                                                                                                                                                                                                                                                                                                                                                                                                                                                                                                                                                                                                                                                                                           |
| Manuscript ID                 | bmjopen-2018-027012                                                                                                                                                                                                                                                                                                                                                                                                                                                                                                                                                                                                                                                                                                                                                                                                                                                                                                                                                       |
| Article Type:                 | Research                                                                                                                                                                                                                                                                                                                                                                                                                                                                                                                                                                                                                                                                                                                                                                                                                                                                                                                                                                  |
| Date Submitted by the Author: | 03-Oct-2018                                                                                                                                                                                                                                                                                                                                                                                                                                                                                                                                                                                                                                                                                                                                                                                                                                                                                                                                                               |
| Complete List of Authors:     | Drennan, Vari; Kingston University & St. George's University of London, Centre for Health & Social Care Research<br>Halter, Mary ; Kingston University & St. George's University of London, Centre for Health & Social Care Research<br>Wheeler, Carly; Kingston University & St. George's University of London<br>Nice, Laura; University of Birmingham, Institute of Clinical Sciences<br>Brearley, Sally; King's College London, Florence Nightingale Faculty of Nursing and Midwifery<br>Ennis, James; University of Birmingham<br>Gabe, Jonathan; Royal Holloway University of London<br>Gage, Heather; University of Surrey, School of Economics<br>Levenson, Ros; Independent consultant,<br>de Lusignan, Simon; University of Surrey, Department of Health Care Management and Policy; St. Georges University of London, Division of Population Health Sciences and Education<br>Begg, Phil; Royal Orthopaedic Hospital<br>Parle, James; University of Birmingham |
| Keywords:                     | Organisation of health services < HEALTH SERVICES ADMINISTRATION & MANAGEMENT, Physician associates, Physician assistants, workforce, hospitals, mixed methods                                                                                                                                                                                                                                                                                                                                                                                                                                                                                                                                                                                                                                                                                                                                                                                                            |
|                               |                                                                                                                                                                                                                                                                                                                                                                                                                                                                                                                                                                                                                                                                                                                                                                                                                                                                                                                                                                           |

SCHOLARONE™  
Manuscripts

**TITLE PAGE****WHAT IS THE CONTRIBUTION OF PHYSICIAN ASSOCIATES IN HOSPITAL CARE IN ENGLAND? A MIXED METHODS, MULTIPLE CASE STUDY.****AUTHORS**

Vari M Drennan , Centre for Health & Social Care Research, Joint Faculty of Kingston University & St. George's University of London, London, UK \*

Mary Halter, Centre for Health & Social Care Research, Joint Faculty of Kingston University & St. George's University of London, London, UK

Carly Wheeler, Centre for Health & Social Care Research, Joint Faculty of Kingston University & St. George's University of London, London, UK

Laura Nice, Institute of Clinical Sciences, University of Birmingham, Birmingham, UK

Sally Brearley, patient and public involvement fellow, Centre for Public Engagement, Joint Faculty of Kingston University & St. George's University of London, London, UK

James Ennis, Institute of Clinical Sciences, University of Birmingham, Birmingham, UK

Jonathan Gabe, Criminology & Sociology, School of Law, Royal Holloway, University of London, Egham, Surrey, UK

Heather Gage, Surrey Health Economics Centre, Department of Clinical & Experimental Medicine, University of Surrey, Guildford, UK

Ros Levenson, Independent researcher, London, UK

Simon de Lusignan, Department of Clinical & Experimental Medicine, University of Surrey, Guildford, UK

Philip Begg, Royal Orthopaedic Hospital, Birmingham, UK

Jim Parle, Institute of Clinical Sciences, University of Birmingham, Birmingham, UK

\*Corresponding author

1  
2  
3 Vari M Drennan, Centre for Health & Social Care Research, Joint Faculty of Kingston  
4 University & St. George's University of London, Cranmer Terrace, London SW170RE.  
5  
6 [v.drennan@sgul.kingston.ac.uk](mailto:v.drennan@sgul.kingston.ac.uk) 0208 725 2339  
7

8 WORD COUNT,  
9

10 4150 excluding title page, abstract, references, figures and tables.  
11  
12  
13  
14  
15  
16

17 **General subject**

18 Health service research  
19  
20

21 **Browse by topic**  
22  
23  
24  
25

26 **KEY WORDS**  
27

28 Physician associates, physician assistants, manpower, workforce, health, hospital, mixed  
29 methods.  
30  
31  
32  
33  
34  
35  
36  
37  
38  
39  
40  
41  
42  
43  
44  
45  
46  
47  
48  
49  
50  
51  
52  
53  
54  
55  
56  
57  
58  
59  
60

## ABSTRACT

**Objectives:** to investigate the deployment of physician associates (PAs); the factors supporting and inhibiting their employment and their contribution and impact on patients' experience and outcomes and the organisation of services.

**Design:** mixed methods within a case study design, using interviews, observations, work diaries and documentary analysis.

**Setting:** six acute care hospitals in three regions of England in 2016-2017.

**Participants:** 43 PAs, 77 other health professionals, 28 managers, 28 patients and relatives.

**Results:** A key influencing factor supporting the employment of PAs in all settings was a shortage of doctors. PAs were found to be acceptable, appropriate and safe members of the medical/surgical teams by the majority of doctors, managers and nurses. They were mainly deployed to undertake inpatient ward work in the medical/surgical team during core weekday hours. They were reported to positively contribute to: continuity within their medical/surgical team, patient experience and flow, inducting new junior doctors, supporting the medical/surgical teams' workload, which released doctors for more complex patients and their training. The lack of regulation and attendant lack of authority to prescribe was seen as a problem in many but not all specialties. The contribution of PAs to productivity and patient outcomes was not quantifiable separately from other members of the team and wider service organisation. Patients and relatives described PAs positively but most did not understand who and what a PA was, often mistaking them for doctors.

**Conclusions:** This study offers new insights concerning the deployment and contribution of PAs in medical and surgical specialties in English hospitals. PAs provided a flexible addition to the secondary care workforce without drawing from existing professions. Their utility in the hospital setting is unlikely to be completely realised without the appropriate level of regulation and authority to prescribe medicines and order ionising radiation within their scope of practice.

## ARTICLE SUMMARY

### Strengths and limitations of this study,

- This is the first study of the contribution of PAs across multiple secondary care specialties in the National Health Service in England.
- A strength was the diversity within and across the six case study hospitals, including size, socio-economic setting, secondary and tertiary care specialties, and geographical location in three regions in England.
- The mix of qualitative and quantitative methods gathered and synthesised data from multiple perspectives and sources, supporting the trustworthiness and credibility of the findings.
- The difficulty of attributing processes, outcomes and costs to the inclusion of one specific professional in team-based acute clinical care limited our analysis in part.

## MAIN TEXT

### BACKGROUND

Health care systems internationally are faced with shortages of doctors and constraints on financial resources, set within a context of an ageing and growing global population. [1, 2] The combination of these factors has resulted in many countries developing mid-level, or advanced clinical practitioners (ACP). [3] ACPs have often been developed from the nursing workforce but in many countries there are other types of ACP roles; one such group are physician assistants (PAs) known as physician associates in the United Kingdom, UK). [4] PAs originated in the United States (US) in the 1960s and have spread to other countries such as Canada and the Netherlands. [4, 5] PAs are a new and rapidly growing occupational group in the UK National Health Service (NHS). [6] PAs are trained at a post-graduate level using the medical model to work in all settings and undertake physical examinations, investigations, diagnosis, and treatment within their scope of practice as agreed with their supervising doctor. [7] Currently, UK PAs cannot prescribe medicines or order ionising radiation, unlike PAs in countries such as the US and the Netherlands. [5, 8] A Department of Health public consultation on the regulation of medical associate professions in the UK, including PAs, will report in 2018. [9] PAs working in primary care in England have been found to complement the work of general practitioners and to be acceptable, appropriate, safe and efficient. [10] Patients reported PAs to provide good quality care but they did not all understand the role. [11] About 75% of PAs in the UK work in secondary care; [12] however, little is known about their contribution or impact. Pilot projects with American trained PAs working in the UK in 2006 and 2008 concluded that PAs assisted medical teams safely, worked at clinical assistant level, and were well received by patients. [13, 14] By 2015, 30 of 201 English NHS hospital trusts (the English term for an NHS provider organisation) were employing PAs [15] and a survey of medical directors in 2016 reported that 44 of 71 respondents were considering employing PAs. [16] While the spread of PAs in English hospitals suggests the role is seen as advantageous, there was little evidence available as to the deployment, acceptability, effectiveness and costs of PAs. This paper reports on an investigation into the deployment, acceptability, and impact of PAs in a purposive sample of six acute care hospital organisations in England. This investigation was part of a larger multi-

phase study. [17] The research questions addressed in the investigation were: how are PAs deployed in hospital medical and surgical teams and what supports or inhibits their inclusion? What is the contribution and impact of including PAs in hospital medical and surgical teams on the patients' experience and outcomes, on the organisation of services, working practices and relationships between professionals?

## METHODS

A mixed methods approach was undertaken in 2016-2017, using a case study design [18] in a purposive sample of six NHS acute care hospital trusts in England which employed PAs. The theoretical framing for the study drew on the work of Donabedian in assessing quality in health care using the dimensions of effectiveness, appropriateness, efficiency, acceptability and safety. [19] The study is reported using the consensus standards for organisational case studies (supplementary file 1). [20]

Potential case study sites were identified through a national survey of medical directors who indicated initial willingness to participate. [16] Final decisions were based on: achieving diversity in geographical location, size and type of acute hospitals, the willingness of PAs, consultants and managers to volunteer to participate, and, in order to ensure anonymity of individual participants, the same medical or surgical specialties had volunteer PAs in at least two case study sites. Characteristics of the case study sites in three regions of England are provided in Table 1.

Table 1: Case study site characteristics (adapted from Drennan et al. [17])

| Hospital | Inpatient beds | Average full time equivalent doctors <sup>a</sup> | Annual income <sup>b</sup> | Type of Location (Office of National Statistics classification) <sup>c</sup> |
|----------|----------------|---------------------------------------------------|----------------------------|------------------------------------------------------------------------------|
| 1        | 1000+          | >1,001                                            | >£500 million              | Urban with Major Conurbation                                                 |
| 2        | 601-800        | <250                                              | <£200 million              | Urban with City and Town                                                     |
| 3        | 601-800        | 501-1,000                                         | £201 – 500 million         | Urban with City and Town                                                     |
| 4        | 1000+          | >1,001                                            | >£500 million              | Urban with Significant Rural                                                 |
| 5        | 601-800        | 251-500                                           | £201 – 500 million         | Urban with Major Conurbation                                                 |
| 6        | 201-400        | 251-500                                           | £201 – 500 million         | Urban with Major Conurbation                                                 |

Source of data: <sup>a</sup>,[21], <sup>b</sup> publicly available hospital annual reports, <sup>c</sup>[22].

## Data collection

Data collection comprised of semi-structured interviews, PA self-report work logs, observations of PAs, review of organisational documents, and requests for routine management information (data, reports, audits) on the work or impact of the PAs.



1  
2  
3 Semi structured interviews were conducted with executive level managers, lead consultants,  
4 PAs and members of the health care teams in which PAs worked (medical, nursing, other  
5 staff), and patients and/or their relatives. Senior clinicians and managers were asked  
6 questions on factors inhibiting and supporting employment of PAs, impact on the service  
7 organisation and patient outcomes as well as costs. Professionals were asked about  
8 deployment of PAs, acceptability, impact on working practices and contribution to patient  
9 experience. The topic guides for interviews of patients and relatives included questions about  
10 their experience as well as about the acceptability of the role. With permission, interviews  
11 were digitally recorded, or notes taken if preferred. Recordings were transcribed and  
12 anonymised. The coding framework was developed iteratively by research team members and  
13 patient representatives. Thematic analysis was conducted. [23].

14  
15  
16 PAs were invited to complete a seven day work log up to three times over the period of the  
17 study. These work logs were adapted from a previous study of PAs in England. [24] Data of  
18 the PA activities, the setting for the activity and time spent on each during each shift recorded  
19 were entered into Microsoft Excel and analysed descriptively.

20  
21 PAs were invited to be observed for up to three sessions by a researcher. For any PA  
22 volunteering, permission was also sought from their supervising consultant. The observations  
23 drew on the ethnographic tradition. [25] PAs sought assent from patients for the researcher to  
24 be present. Field notes of the PAs' activities and interactions were later written up and  
25 analysed. [26]

26  
27  
28 Documentary analysis was undertaken of publicly available annual reports, board minutes  
29 and strategies. [23] Participant managers and clinicians were invited to share any relevant  
30 internal data or reports that could assist in answering the research questions, for example,  
31 patient throughput and outcome data and expenditure on medical locums. The intention, if  
32 data were available, was to compare before and after PAs were employed in a particular  
33 service.

34  
35  
36 The NHS Health Research Authority approval (IRAS project ID: 181193) and NHS London  
37 Central Research Ethics Committee (REC reference: 15/LO/1339) approval were obtained.

### 38 39 40 **Patient and public involvement**

41  
42  
43 The research questions and study design were initially informed by patient and public input  
44 from a previous study of PAs in primary care. [11,12] Patient and public involvement (PPI)  
45 in this study included: a PPI representative(SB) was a co-applicant and member of the

research team, the study advisory group had two PPI representatives and was chaired by SB, PPI forums were established whose members gave input into research materials, interpretation of findings and dissemination. All PPI representatives attended an emerging findings seminar and received summaries of the findings.

## FINDINGS

The six case study sites employed approximately 70 PAs, and were recruiting more, in a wide range of adult and paediatric specialties. Forty-three PAs participated in the study, working in 13 adult and paediatric specialties (including emergency departments). PAs provided data through interviews (n=41), observations (n= 82 sessions) and work logs (18 PAs provided 107 days). The PAs had been qualified between one and nine years. A total of 175 interviews were conducted across the sites (table 2).

Table 2: Participants interviewed

| Type of participant                                              | Number interviewed |
|------------------------------------------------------------------|--------------------|
| Executive level managers and clinicians                          | 18                 |
| PAs                                                              | 41                 |
| Patients and relatives                                           | 28                 |
| Consultants (including those with lead responsibilities for PAs) | 24                 |
| Junior doctors                                                   | 17                 |
| Operational managers                                             | 11                 |
| Nurses                                                           | 28                 |
| Other types of staff e.g. allied health professions              | 8                  |
| Total                                                            | 175                |

Annual reports, workforce strategies and board minutes were collected for each hospital for the period of the study (n=139). The managers and clinicians were unable to provide any internal service or patient level data to assist in answering the research questions.

Findings from the different types of data have been combined to address the three research questions: the factors supporting and inhibiting their employment; the deployment of the PAs; and their contribution and impact on patients' experience, outcomes and the organisation of services.

### Factors influencing the decisions to employ PAs

The evidence here is drawn from the executive level interviews, from senior clinicians and operational managers and from documentary analysis. Necessity was the most commonly cited reason by the executive and senior clinicians for hospitals beginning to employ PAs in order to address four problems:

- 1  
2  
3 1. A decrease in the availability of junior doctors with a consequent over-reliance  
4 on locum doctors to cover medical shifts, with attendant concerns about high costs  
5 and patient safety,  
6
- 7  
8 2. Junior doctors not being able to undertake their training activities as they were  
9 being diverted to cover service rota gaps – an issue that had been the subject of a  
10 Deanery review in one hospital,  
11
- 12  
13 3. An increase in patient workload and consequent challenges in ensuring  
14 sufficient doctors available to cover the in-patient wards,  
15
- 16  
17 4. A need to improve the quality of care, this included the necessity to improve  
18 the quality performance of hospital as assessed by the Care Quality Commission  
19 (CQC).  
20  
21

22 The employment of PAs was only one amongst multiple workforce strategies being employed  
23 in all the hospitals to address these problems. Utilising PAs, however, was considered  
24 advantageous as it did not deplete other staff groups.  
25  
26

27  
28 *“The workforce in every department is limited and so to move pharmacists or*  
29 *nursing staff across to do what have traditional previously been medical roles, means*  
30 *that we’re then robbing another profession of their workforce which they desperately*  
31 *need as well ...and that’s why we’ve looked to recruit PAs ”. ID 46 senior clinician:*

32  
33  
34  
35 In most of the hospitals, the impetus to employ PAs had come from individual specialties  
36 within clinical directorates, rather than an executive led initiative. At the start of the study  
37 period, two of the hospitals had documented executive level support and engagement with the  
38 introduction and education of PAs as well as production of public information about their  
39 PAs. By the end of the study five of the hospitals had documented executive level support for  
40 workforce planning strategies which included increased PA numbers in support of their  
41 medical establishment.  
42  
43  
44  
45

46 The chief inhibiting factor to PA employment stated was the lack of regulation and attendant  
47 lack of authority to prescribe medicines and order ionising radiation.  
48  
49

50  
51 *“Prescribing is the Achilles' heel of the physician associate; not being able to*  
52 *prescribe has meant that their essential contribution of hours has been less than we*  
53 *would have wanted it.” ID 48 senior clinician*

1  
2  
3 While negative attitudes of some senior doctors and nurses were reported as initial inhibiting  
4 factors to employing PAs, this was reported to change over time as PAs became part of teams  
5 and demonstrated what they could contribute. Many senior staff reported that interest in  
6 having PAs in medical/surgical teams spread amongst the consultants once they observed  
7 PAs in other teams and at work.  
8  
9  
10

### 11 **The deployment of PAs**

12  
13 The evidence here is drawn from the work logs, interviews and observations. The PAs  
14 described themselves as belonging to the medical/surgical team, and their place in work rotas  
15 reflected this, with their main working hours being daytime on weekdays. Most PAs  
16 described their main work taking place on the ward or unit and this was evident from the  
17 work logs and observations. Only a small number of PAs undertook any work in outpatients  
18 or operating theatres and if so for a small percentage of their time (Figure 1).  
19  
20  
21  
22  
23

---

24 Figure 1 about here

---

25  
26 Figure 1 Working setting for PAs as a percentage of their work hours recorded on worklogs  
27  
28  
29

30 The core role of the PAs in all adult and paediatric specialties (apart from those working in  
31 the ED) was to undertake ward-based work for the medical/surgical team (Table 3). This  
32 ward-based work was described and observed to include: participating in and following up  
33 ward rounds and patient reviews led by doctors; clerking and assessment of patients;  
34 preparing for, responding to requests and concerns about patients from nursing staff, and  
35 communicating with patients and relatives. Twenty and 18 per cent of the PAs time, working  
36 in surgical and medical specialties [adult and paediatric excluding those in the ED]  
37 respectively, was spent in ordering tests, preparing discharge summaries and administration  
38 (Table 3).  
39  
40  
41  
42  
43  
44  
45  
46  
47  
48  
49  
50  
51  
52  
53  
54  
55  
56  
57  
58  
59  
60

Table 3 Physician associates' time (recorded in work logs) spent on individual work activities, by surgical and medical specialties.

| Activity                                                                                 | Surgical specialties * |                        |                                     | Medical specialties ~ |                        |                                     |
|------------------------------------------------------------------------------------------|------------------------|------------------------|-------------------------------------|-----------------------|------------------------|-------------------------------------|
|                                                                                          | Total hours            | Mean (SD) weekly hours | Percentage of total hours overall # | Total hours           | Mean (SD) weekly hours | Percentage of total hours overall # |
| Inpatient ward round (with consultant/registrar)                                         | 84                     | 7.64 (4.07)            | 14%                                 | 61                    | 6.1 (2.95)             | 15%                                 |
| Inpatient ward round (independent)                                                       | 13.25                  | 1.2 (1.59)             | 2%                                  | 57.75                 | 5.78 (3.07)            | 14%                                 |
| Inpatient clerking of new patients                                                       | 30.25                  | 2.75 (2.82)            | 5%                                  | 19.5                  | 1.95 (1.79)            | 5%                                  |
| Inpatient reviewing patients                                                             | 42.5                   | 3.86 (4.8)             | 7%                                  | 69.75                 | 6.98 (6.23)            | 17%                                 |
| Inpatient pre/post-operative assessment                                                  | 14.5                   | 1.32 (1.8)             | 2%                                  | 0.5                   | 0.05 (0.16)            | <1%                                 |
| Inpatient discussion of patient care/case management with clinical colleagues            | 41                     | 3.73 (2.84)            | 7%                                  | 27.25                 | 2.72 (3.18)            | 7%                                  |
| Outpatient clerking new patients                                                         | 3                      | 0.27 (0.9)             | 1%                                  | 1.5                   | 0.15 (0.34)            | <1%                                 |
| Outpatient patient consultation                                                          | 23.25                  | 2.11 (3.02)            | 4%                                  | 3.75                  | 0.38 (1.19)            | 1%                                  |
| Outpatient pre-operative assessment                                                      | 0.75                   | 0.07 (0.23)            | <1%                                 | -                     | -                      | -                                   |
| Outpatient discussion of patient care/case management with clinical colleagues           | 0.5                    | 0.05 (0.15)            | <1%                                 | 4.25                  | 0.42 (1.34)            | 1%                                  |
| Emergency department clerking new patients                                               | 3.25                   | 0.3 (0.43)             | 1%                                  | 5                     | 0.5 (1.58)             | 1%                                  |
| Emergency department patient consultation                                                | 1.25                   | 0.11 (0.26)            | <1%                                 | -                     | -                      | -                                   |
| Emergency department discussion of patient care/case management with clinical colleagues | 0.75                   | 0.07 (0.16)            | <1%                                 | 5                     | 0.5 (1.58)             | 1%                                  |
| Assisting in theatre/interventional procedures                                           | 66.25                  | 6.02 (6.28)            | 11%                                 | 11.25                 | 1.12 (1.46)            | 3%                                  |
| Patient education (any setting)                                                          | 14.25                  | 1.3 (1.52)             | 2%                                  | 8                     | 0.8 (1.25)             | 2%                                  |
| Discussing care with relatives (any setting)                                             | 12.5                   | 1.14 (1.07)            | 2%                                  | 28.75                 | 2.88 (2.21)            | 7%                                  |
| Routine procedures (e.g. phlebotomy, cannulation, ECG) (any setting)                     | 34.25                  | 3.11 (2.13)            | 6%                                  | 26.75                 | 2.68 (1.2)             | 7%                                  |
| TTOs and discharge summaries (any setting)                                               | 59                     | 5.36 (4.4)             | 10%                                 | 34.5                  | 3.45 (2.37)            | 8%                                  |
| Requesting investigations (any setting)                                                  | 33.75                  | 3.07 (2.78)            | 6%                                  | 20.75                 | 2.08 (1.65)            | 5%                                  |
| Administration                                                                           | 24.25                  | 2.2 (3.82)             | 4%                                  | 2.5                   | 0.25 (0.58)            | 1%                                  |
| Teaching                                                                                 | 22.5                   | 2.04 (2.49)            | 4%                                  | 10.5                  | 1.05 (1.46)            | 3%                                  |
| Own training/study                                                                       | 14.5                   | 1.32 (2.22)            | 2%                                  | 2.5                   | 0.25 (0.49)            | 1%                                  |
| Networking/attending meetings                                                            | 15.5                   | 1.41 (1.86)            | 3%                                  | 1.75                  | 0.18 (0.37)            | <1%                                 |
| Strategy/Policy/Service Development                                                      | 2.75                   | 0.25 (0.58)            | <1%                                 | 2.5                   | 0.25 (0.79)            | 1%                                  |
| Other^                                                                                   | 31.75                  | 2.89 (4.24)            | 5%                                  | 1                     | 0.1 (0.32)             | <1%                                 |
| Total                                                                                    | 589.5                  | 53.59 (11.68)          | n/a                                 | 406                   | 40.6 (12.78)           | n/a                                 |

\* N =10 participants , ~ N= 6 participants , # due to rounding, percentages may not add up to 100% , ^ "Other" activities included: collecting notes, surgical planning meeting, interpreting investigations, ward list/pre-operative, multi-disciplinary team, airway support & assisting intubation, telephone clinic, university teaching, ECG electro-cardiogram; SD standard deviation; TTOs to take out,

1  
2  
3 In the ED setting the PAs worked in the major, and sometimes minors, sections where they  
4 were described and observed to be assigned to undertake patient assessments (following  
5 clinical triage) and, as agreed by the senior supervising doctor after presentation of each  
6 patient assessment, order investigations and formulate management and treatment plans.  
7 They were observed to work as part of the multidisciplinary team alongside junior doctors  
8 and other advanced clinical practitioners, who reported similarly to the senior doctor.  
9

10  
11  
12 Individual PA roles were described and observed to be moulded to the need of a service and  
13 that over time some PAs had been trained to undertake procedures common for that speciality  
14 such as lumbar punctures, echo cardiograms, peripherally inserted central lines or nerve  
15 blocks.  
16  
17

18  
19  
20 Consultants and managers reported that PAs were primarily deployed to help address gaps in  
21 medical rotas.  
22

### 23 24 **The contribution and impact of including PAs in medical/surgical teams to** 25 **patients' experience** 26

27  
28 Patients and relatives reported very positive views of the PAs attending them. Particular  
29 aspects mentioned were: the PA's constant presence on the ward meant they were easy to  
30 approach and PAs followed up items from the doctor's ward round and spent time explaining  
31 decisions and management plans to the patients and relatives.  
32  
33

34  
35 *"... he's [the PA] been quite instrumental in helping me understand things because*  
36 *when doctors come they say things that people are writing down and then they walk*  
37 *away and you find out that they have changed your medication and obviously I need*  
38 *an answer as to why, so I go to him and he explains"* ID143 patient  
39  
40

41  
42 Many of those interviewed and observed were uncertain about what a PA was or mistook  
43 them for a doctor, despite the PA or the consultant introducing them as a PA:  
44

45  
46 *"I thought she was a doctor. But is she?" ....she came to see me, and I was perfectly*  
47 *happy with her expertise and everything else, so I don't want to give the wrong*  
48 *impression. But I had other things on my mind [than] to ask what her actual title*  
49 *was."* ID 106 patient  
50  
51

52  
53 All of the patients and relatives reported that they saw the PAs working within the  
54 medical/surgical team, PAs provided good care, and referred back to senior doctors. All  
55 patients and relatives interviewed were content to be attended to by a PA in the future.  
56  
57

1  
2  
3 Many of the health professional and managerial participants voluntarily offered information  
4 on the high volume of compliments and presents the PAs received from patients.  
5

6  
7 **The contribution and impact on outcomes and the organisation of services of**  
8 **including PAs in medical/surgical teams: the professionals' view**  
9

10 The majority of doctors, nurses and managers described the contribution of PAs as positive.

11  
12 *“They work alongside our junior doctors, support the junior doctors, and are*  
13 *clinically very valuable. Well, almost invaluable now.”* ID 185 consultant  
14  
15

16 A small number of doctors and nurses in high dependency specialities considered that, having  
17 employed or worked with PAs, doctors were more suited to the work of the speciality. The  
18 extent to which the PAs' lack of authority to prescribe was influential in this was unclear.  
19

20 The reported positive contribution of PAs was grouped into themes of: providing continuity,  
21 aiding patient flow, supporting patient safety and releasing doctor time for more complex  
22 patients and training.  
23  
24  
25

26  
27 **Continuity**  
28

29 One of the most frequently reported impacts on the organisation was that PAs provided  
30 continuity of staffing in the medical/surgical team i.e. personal and team continuity. They  
31 provided continuity in presence and continuity in knowledge and relationships which was  
32 reported as beneficial to patients, nurses and doctors in these ways:  
33  
34  
35

- 36 • Continuity in presence on the in-patient wards which increased access and early  
37 escalation of problems to the medical/surgical team for nurses: *“If we need any form*  
38 *of escalation, getting in touch with doctors, we can also get in touch with the PAs, the*  
39 *PAs chase the doctors, so their role is quite significant as well. ...to get things going*  
40 *so patients are not left for long hours waiting for a doctor because doctors are doing*  
41 *other things, doctors are in theatres. They're like the middle person who get things*  
42 *done between both sides, nurses and doctors.”* ID 71 senior nurse  
43  
44
- 45 • Continuity in knowledge about current in-patient status, management plans and  
46 patients' progress, which facilitated updating patients and the medical/surgical team:  
47 *“It's that continuity, like I've been on call so I've not been on the ward for five days,*  
48 *I'm like 'what's going on?' and they're [PAs] like 'seven and five are the sick ones*  
49 *and ten is the one we're trying to get out'. And like they know that and that's very*  
50 *helpful.”* Foundation year doctor ID 207  
51  
52  
53  
54  
55  
56  
57

- 1  
2  
3 • Continuity in knowledge about the policies and practices (clinical and otherwise) of  
4 the department, the individual consultants and the hospital which was reported to be  
5 of particular value for doctors on short training rotations new to that particular  
6 workplace. “*Our SHO equivalent doctors rotate all the time... so what they [the PAs]  
7 really provide is this amazing continuity of how the system works ... how we care for  
8 patients who’ve had [specialty] procedures, how we manage patients with different  
9 [specialty] conditions.*” ID51 registrar  
10  
11  
12  
13

### 14 15 **Aiding patient flow**

16  
17 PAs were described and observed to undertake large amounts of non-patient facing clinical  
18 work for the medical /surgical team. All participants reported PAs helped smooth and  
19 improve patient flow.  
20  
21

22 “*to liaise within teams, to liaise with other departments, to book a test, to get in touch  
23 with a GP, to book a bed for a patient which [sic] is frail and elderly, which [sic]  
24 need antibiotics a few days before, comes from far away, ... and they [the PAs] can  
25 really help for that organisational aspect a lot, and also help in the more clinical  
26 aspect... I think they [the PAs] smooth things out with many issues that need to be  
27 prepared and planned for.*” ID 95 registrar  
28  
29  
30  
31

32 “*PAs provide ward cover so discharge summaries are completed on time, meaning  
33 patients leave hospital without delay and bed capacity is released for other patients.*”  
34 ID 81 manager.  
35  
36  
37

38 One manager described the PAs as ‘oil’ in the system, while a consultant likened the work  
39 of the PAs to ‘the glue’ within the medical/surgical team.  
40  
41

### 42 **Releasing doctors time**

43  
44 The presence of a PA in the team was considered to release the doctors’ time to attend more  
45 complex patients and also to attend patients in outpatients and theatre.  
46  
47

48 “*They’re [PAs] just great at coming in and just taking off those little jobs that will  
49 really slow you down unnecessarily and paving the way for the more important sicker  
50 patients to get more of your time and attention.*” ID 12 core training doctor  
51  
52

53 However, caveats were offered in that in some specialties efficiencies of the role were not  
54 fully realised due to lack of authority to prescribe. Some registrars gave estimates that the  
55 PAs, without authority to prescribe, could cover about 70% of the work required.  
56  
57



### ***Patient safety***

All consultants, registrars and managers reported the PAs to be safe with no serious incidents or patient complaints. Many of the doctors reported that the PAs were careful to work within their capabilities and within guidelines and appropriately refer to the doctors within the team. The continuity PAs provided as described above was viewed as important in patient safety. In some services the PAs' duty times were arranged to cover for absences of doctors e.g. to attend training and reduce the use of locum doctors. Consultants and managers considered locum doctors that were new to their service as less efficient, less safe, and costlier than PAs.

*“Better for patient safety to have the PAs than using people that you don't know, locums coming in can create chaos.”* ID 114 consultant

### **Quantifying the impact**

When asked to quantify the impact of the PAs, all the senior clinicians and managers pointed out that it was hard to separate out the individual from the overall large, multi-disciplinary team (s) delivering acute care. Those that were able to offer views did so anecdotally describing reduction in spending on locum doctors, improved use of senior clinicians' time and greater productivity of the medical/surgical team:

*“We have had to spend more money on [locum] doctors when we don't have PA cover, just to double up so it's safe.”* ID203 manager

*“PAs assisting in theatres – this has seen a reduction in theatre cancellations and increased efficiency due to a lack of junior doctors being available to assist. Resulting in reduced wait times and complaints, and income generation”.* ID81 Manager

### **DISCUSSION**

This study offers new insights as to the deployment and contribution of PAs in a range of medical and surgical specialties in English NHS hospitals. PAs were found to be acceptable, appropriate and safe members of the medical/surgical teams by the majority of the doctors, managers and nurses. They were mainly deployed to undertake inpatient ward work in the medical/surgical team during core weekday hours. They were reported to contribute positively to continuity in the medical/surgical team, to patient experience and flow, to inducting new junior doctors, and supporting the medical/surgical teams' workload thus releasing doctors for attending the more complex patients and for their training. The continuity that PAs brought to medical/surgical teams was viewed as more useful and safer

1  
2  
3 than employing locum doctors, who were also reported as costlier to the service than PAs.  
4 There were suggestions that some PAs increased senior clinicians' productivity. The finding  
5 of PAs practicing safely has also been reported in a systematic review. [27] Observations on  
6 the continuity that PAs provide within medical/surgical teams have been made in North  
7 America and the Netherlands. [28, 29] and in the US regarding releasing doctors to undertake  
8 training. [30]

9  
10  
11  
12  
13 Patients and relatives reported that they viewed PAs and their contribution positively but  
14 most did not understand what a PA was. Patients have been reported to have higher levels of  
15 satisfaction from hospital teams which included PAs compared to those without in the  
16 Netherlands. [31]. Patient confusion about the PAs role has been reported before in the  
17 primary care setting. [32]

18  
19  
20  
21  
22 The contribution of PAs to productivity, patient experience and outcomes was not  
23 quantifiable separately from other members of the team and wider service organisation. This  
24 finding has also been reported in the US. [33] The lack of authority to prescribe and order  
25 ionising radiation was reported as an inhibiting factor to their employment and meant that in  
26 some specialties the full potential of PAs could not be realised. A Dutch study, where PAs  
27 have authority to prescribe, reported no difference in cost-effectiveness of in-patient care  
28 between teams with and without PAs. [34]

### 29 30 31 32 33 **Strengths and limitations**

34  
35  
36 The strength of this study was that it was undertaken in different types of hospitals, across  
37 different specialities and a large number of PAs. The mixed methods case study approach  
38 gave qualitative insights from a wide range of stakeholders and illuminated the quantitative  
39 data from PA work logs. The main limitations were the low response rate in providing work  
40 logs, which we understood was a result of workload pressures, and that participants were  
41 either not aware or were unable to access and provide to the research team quantitatively  
42 measurable data on the effect of the introduction of PA on patient outcomes or human  
43 resource expenditure. In addition, attribution of changes in quality of patient care, patient  
44 safety events or cost savings to the introduction of PAs was problematic when such  
45 introduction commonly went alongside other changes or response to other significant events  
46 such as unprecedented surges in demand and workforce shortages. [35, 36] However, we  
47 were able to describe and scope the range of potential impacts. These might be explored in  
48 more depth in future studies using matched comparisons of medical/surgical teams as in a  
49  
50  
51  
52  
53  
54  
55  
56  
57

1  
2  
3 Dutch study [32], or in a ‘step-wedge’ design (where the change is introduced sequentially in  
4 all sites so that all ‘participants’ get the intervention, but not simultaneously).  
5

## 6 7 **CONCLUSION**

8  
9 Planning and developing a medical and surgical workforce can be challenging. Achieving a  
10 sustainable medical workforce with the right balance of consultants, specialty doctors (i.e. not  
11 in training posts) and junior doctors has to take account of: a) the service demands, b) the  
12 training requirements for career advancement and c) the creation of manageable jobs within  
13 interesting careers. Having a cadre of flexible, advanced clinical practitioners trained in the  
14 medical model, who can support doctors may help address inherent tensions between service  
15 demands, training requirements and budgetary constraints, as well as mitigate against cyclical  
16 shortages. PAs could provide a flexible addition to the secondary care workforce without  
17 drawing from existing professions. PAs may provide personal and team continuity not  
18 provided by junior doctors, who frequently rotate to new training posts. Many experienced  
19 clinicians valued this continuity more highly than the service delivered by locum doctors  
20 unfamiliar with the setting. However, PAs’ utility in the hospital setting is unlikely to be fully  
21 realised without the appropriate level of regulation with attendant authority to prescribe  
22 medicines and order ionising radiation within their scope of practice.  
23  
24  
25  
26  
27  
28  
29  
30  
31  
32  
33  
34  
35  
36  
37  
38  
39  
40  
41  
42  
43  
44  
45  
46  
47  
48  
49  
50  
51  
52  
53  
54  
55  
56  
57  
58  
59  
60

## ACKNOWLEDGEMENTS

Our thanks to all the patient and staff participants who generously gave their time and views during a period when there were many pressures and demands on NHS services.

### Funding statement

This project was funded by the National Institute for Health Research Health Services and Delivery Research Programme (project number 14/19/26). This paper presents independent research commissioned by the National Institute for Health Research (NIHR). The views and opinions expressed by authors in this publication are those of the authors and do not necessarily reflect those of the NHS, the NIHR, the Health Service and Delivery Research Programme or the Department of Health.

### Competing interests statement

SdL is head of the Department of Clinical and Experimental Medicine at the University of Surrey, which launched a physician associate course in 2016. JP chairs the UK and Ireland Board for Physician Associate Education and was director of the physician associate course at the University of Birmingham. PB is honorary faculty at the University of Birmingham and has taught on the physician associate programme since 2008. JE teaches part time on the University of Birmingham physician associate course.

### Authors contribution

Conception, design and receiving funding for the study: VMD, MH, SB, SdL, HG, JG, PB, JE, JP. Lead for PPI: SB. Acquisition of the data: CW, LN, JE, RL, MH, VMD. Analysis and interpretation of the data, drafting and critical revision of the manuscript for important intellectual content, accountable for all aspects of the work and approval of the final manuscript: VMD, MH, CW, LN, RL, SB, SdL, HG, JG, PB, JE, JP.

### Data sharing statement

No additional data are available

**REFERENCES**

1. World Health Organisation. Global strategy on human resources for health: Workforce 2030. 2016. URL [http://www.who.int/hrh/resources/pub\\_globstrathrh-2030/en/](http://www.who.int/hrh/resources/pub_globstrathrh-2030/en/) Access April 2018
2. OECD. Fiscal Sustainability of Health Systems: Bridging Health and Finance Perspectives, 2015 OECD Publishing, Paris, <http://dx.doi.org/10.1787/9789264233386-en>. Accessed April 2018
3. Global Health Workforce Alliance. Mid-level health workers for delivery of essential health services. A global systematic review and country experiences. 2013. Reference no. WHO/hss/hwa/mlp 2013/ENG. World Health Organisation. <http://www.who.int/workforcealliance/knowledge/resources/mlp2013/en/> Accessed April 2018
4. Rick T.J, Ballweg, R. Physician Assistants and the Expanding Global Health-Care Workforce. *The American journal of tropical medicine and hygiene*, 2017. 97:643-644.
5. Cawley JF, Hooker RS. Physician assistants in American medicine: the half-century mark. *The American Journal of Managed Care*. 2013; 19:e333-41.
6. Aiello, M, Roberts, K.A. Development of the United Kingdom physician associate profession. *Journal of the American Academy of Physician Assistants*. 2017; 30:1-8.
7. Department of Health. The Competence and Curriculum Framework for the Physician Assistant. London: Department of Health 2006. URL: [http://webarchive.nationalarchives.gov.uk/+/http://www.dh.gov.uk/en/Publicationsandstatistics/Publications/PublicationsPolicyAndGuidance/DH\\_4139317](http://webarchive.nationalarchives.gov.uk/+/http://www.dh.gov.uk/en/Publicationsandstatistics/Publications/PublicationsPolicyAndGuidance/DH_4139317) (accessed April 2018).
8. Netherlands Association of Physician Assistants. Independency of Physician Assistants and Nurse Practitioners regulated in the Netherlands. 2017. URL <https://www.napa.nl/english/> (accessed April 2018).
9. Department of Health. Open Consultation. The regulation of medical associate professions in the UK. Published 12 October 2017. URL [www.gov.uk/government/consultations/regulating-medical-associate-professions-in-the-uk](http://www.gov.uk/government/consultations/regulating-medical-associate-professions-in-the-uk) (accessed December 2017).
10. Ritsema TS. Faculty of Physician Associates Census Results. 2017. 2017 <http://www.fparcp.co.uk/about-fpa/fpa-census> (accessed April 2018).

- 1  
2  
3 11. Drennan VM, Halter M, Joly L, Gage H, Grant RL, Gabe J, Brearley S, Carneiro W,  
4 de Lusignan S. Physician associates and GPs in primary care: a comparison. *Br J Gen Pract*.  
5 2015 65(634):e344-50.  
6  
7
- 8 12. Halter M, Drennan VM, Joly LM, et al. Patients' experiences of consultations with  
9 physician associates in primary care in England: A qualitative study. *Health Expectations*.  
10 2017; 20:1011-1019. <https://doi.org/10.1111/hex.12542>  
11  
12
- 13 13. Woodin J, McLeod H, McManus R, et al. Evaluation of US-trained physician  
14 assistants working in the NHS in England. Final Report. Birmingham UK, University of  
15 Birmingham, 2005.  
16  
17
- 18 14. Farmer J, Currie M, Hyman J, et al. Evaluation of physician assistants in National  
19 Health Service Scotland. *Scott Med J*. 2011 56(3):130-4. doi: 10.1258/smj.2011.011109.  
20  
21
- 22 15. Ritsema T. UK Physician Associates Association (UKAPA). 2015 Census Results.  
23 London: Faculty of Physician Associates. 2015. Accessed last 3-10-2018 at  
24 <http://www.fparcp.co.uk/about-fpa/fpa-census>  
25  
26
- 27 16. Halter M, Wheeler C, Drennan VM, et al. Physician associates in England's hospitals:  
28 a survey of medical directors exploring current usage and factors affecting recruitment. *Clin*  
29 *Med (Lond)*. 2017 2:126-131. doi: 10.7861/clinmedicine.17-2-126.  
30  
31
- 32 17. Drennan VM, Halter M, and Wheeler C et al. Investigating the contribution of  
33 physician associates to secondary care in England: a mixed methods study (the PA-SCER  
34 study). NIHR Health Service & Delivery Research. 2018 *in press*  
35  
36  
37
- 38 18. Yin RK. *Case Study Research and Applications: Design and Methods*. 6th Ed.  
39 Thousand Oaks, California: Sage Publications Inc. 2018.  
40  
41
- 42 19. Donabedian A. The quality of care. How can it be assessed? *JAMA* 1988; 260:1743-  
43 1748.  
44  
45
- 46 20. Rodgers M, Thomas S, Harden M, et al. Developing a methodological framework for  
47 organisational case studies: a rapid review and consensus development process. *Health Serv*  
48 *Deliv Res* 2016;4(1) doi.org/10.3310/hsdr04010.  
49  
50
- 51 21. NHS Digital, NHS Hospital & Community Health Service (HCHS): HCHS doctors,  
52 by grade and organisation, in NHS Trusts and CCGs in England, as at 31 January to 31  
53 December 2016, average full time equivalent. <https://digital.nhs.uk/catalogue/PUB23470>.  
54  
55  
56 (Accessed May 2018).  
57

- 1  
2  
3 22. Department for Environment, Food & Rural Affairs. Official Statistics 2011. Rural-  
4 Urban Classification of Local Authorities and other geographies. 2014.  
5 [www.gov.uk/government/statistics/2011-rural-urban-classification-of-local-authority-and-](http://www.gov.uk/government/statistics/2011-rural-urban-classification-of-local-authority-and-other-higher-level-geographies-for-statistical-purposes)  
6 [other-higher-level-geographies-for-statistical-purposes](http://www.gov.uk/government/statistics/2011-rural-urban-classification-of-local-authority-and-other-higher-level-geographies-for-statistical-purposes) (accessed May 2018).  
7  
8  
9  
10 23. Boyatzis RE. Transforming qualitative information: Thematic analysis and code  
11 development. Thousand Oaks, Calif.: Sage; 1998.  
12  
13 24. Drennan V, Halter M, Brearley S et al. Investigating the contribution of physician  
14 assistants to primary care in England: a mixed-methods study. *Health Serv Deliv Res* 2014;2  
15 (16) DOI: 10.3310/hsdr02160 Accessed last May 2018 at  
16 <https://www.journalslibrary.nihr.ac.uk/hsdr/hsdr02160/#/abstract>  
17  
18  
19  
20 25. Pope C, Mays N. Observational methods p 32-42. in Pope C. Mays, N. editors.  
21 *Qualitative research in health care*. 4th edn. Chichester: John Wiley & Sons; 2008.  
22  
23 26. McCann, L, Granter E, Hyde P, Hassard, J. Still Blue-Collar after all these Years? An  
24 Ethnography of the Professionalization of Emergency Ambulance Work. *Journal of*  
25 *Management Studies* 2013; 50:750–776.  
26  
27 27. Halter M, Wheeler C, Pelone F et al. Contribution of physician assistants/associates to  
28 secondary care: a systematic review. *BMJ Open*. 2018 8(6):e019573. doi: 10.1136/bmjopen-  
29 2017-019573.  
30  
31  
32  
33 28. Kartha A, Restuccia JD, Burgess JF, Benzer J, Glasgow J, Hockenberry J, et al. Nurse  
34 practitioner and physician assistant scope of practice in 118 acute care hospitals. *Journal of*  
35 *Hospital Medicine*. 2014;9:615-20.  
36  
37 29. Timmermans MJ, van Vught AJ, Van den Berg M, Ponfoort ED, Riemens F, van  
38 Unen J. et al. Physician assistants in medical ward care: a descriptive study of the situation in  
39 the Netherlands. *Eval Clin Pract*. 2016 22:395-402. <https://doi.org/10.1111/jep.12499>  
40  
41  
42  
43 30. Stahlfeld KR, Robinson JM, Burton EC. What do physician extenders in a general  
44 surgery residency really do? *J Surg Educ*. 2008; 65:354-8.  
45  
46 <https://doi.org/10.1016/j.jsurg.2008.06.002>  
47  
48  
49  
50 31. Timmermans MJC, van Vught AJAH, Peters YAS, et al. The impact of the  
51 implementation of physician assistants in inpatient care: A multicenter matched-controlled  
52 study. *PLoS ONE* 2017; 12 (8):e0178212. <https://doi.org/10.1371/journal.pone.0178212>  
53  
54  
55  
56  
57  
58  
59  
60

- 1  
2  
3 32. Halter M, Drennan VM, Joly LM, et al. Patients' experiences of consultations with  
4 physician associates in primary care in England: A qualitative study. *Health Expectations*.  
5 2017; 20:1011-1019.  
6  
7  
8 33. Moote M, Krsek C, Kleinpell R, Todd B. Physician assistant and nurse practitioner  
9 utilization in academic medical centers. *Am J Med Qual*. 2011; 26:452-60  
10 <https://doi.org/10.1177/1062860611402984>  
11  
12  
13 34. Timmermans MJC, van den Brink GT, van Vught AJAH, etl. The involvement of  
14 physician assistants in inpatient care in hospitals in the Netherlands: a cost-effectiveness  
15 analysis. *BMJ Open*. 2017; 7:e016405. doi: 10.1136/bmjopen-2017-016405.  
16  
17  
18 35. House of Commons. NHS Winter Pressures: 2017/18 Summary Commons Briefing  
19 Papers. Commons Briefing papers CBP-8210. URL  
20 <https://researchbriefings.parliament.uk/ResearchBriefing/Summary/CBP-8210> (accessed last  
21 20th June 2018).  
22  
23  
24  
25 36. BBC News. Thousands of NHS nursing and doctor posts lie vacant. 29 February  
26 2016. URL <http://www.bbc.co.uk/news/health-35667939> (accessed last 20th June 2018).  
27  
28  
29  
30  
31  
32  
33  
34  
35  
36  
37  
38  
39  
40  
41  
42  
43  
44  
45  
46  
47  
48  
49  
50  
51  
52  
53  
54  
55  
56  
57  
58  
59  
60



1  
2  
3  
4  
5  
6  
7  
8  
9  
10  
11  
12  
13  
14  
15  
16  
17  
18  
19  
20  
21  
22  
23  
24  
25  
26  
27  
28  
29  
30  
31  
32  
33  
34  
35  
36  
37  
38  
39  
40  
41  
42  
43  
44  
45  
46  
47  
48  
49  
50  
51  
52  
53  
54  
55  
56  
57  
58  
59  
60

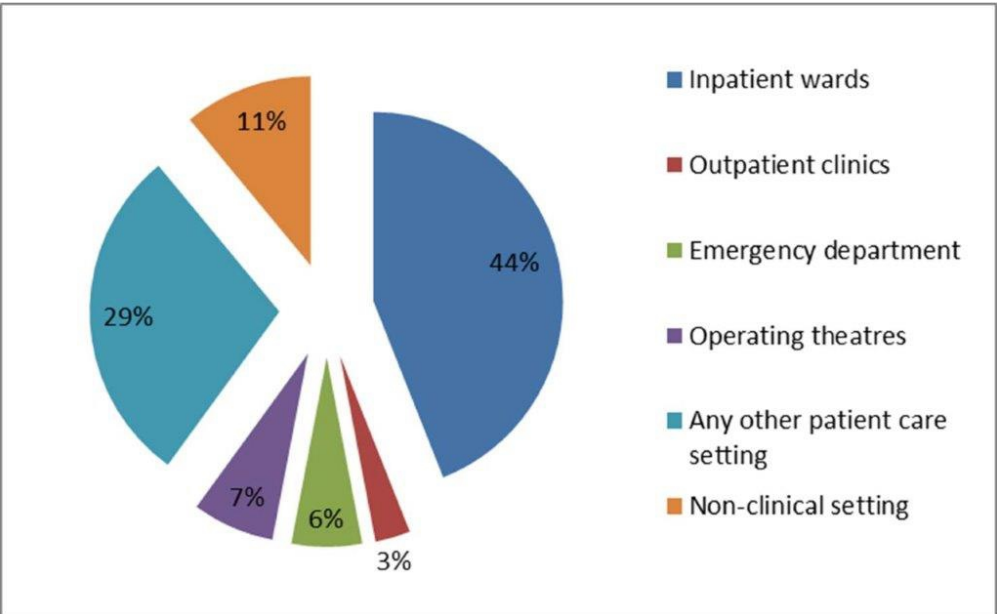

Figure 1  
270x167mm (96 x 96 DPI)

## Supplementary file 1

## Consensus standards for the reporting of organisational case studies

| <b>Reporting item</b>                                                                                                                         | <b>Page number on which item was reported</b> | <b>Page number of justification for not reporting</b> |
|-----------------------------------------------------------------------------------------------------------------------------------------------|-----------------------------------------------|-------------------------------------------------------|
| <b>Describing the design</b>                                                                                                                  |                                               |                                                       |
| 1. Define the research as a case study                                                                                                        | 6                                             |                                                       |
| 2. State the broad aims of the study                                                                                                          | 5                                             |                                                       |
| 3. State the research question(s)/hypotheses                                                                                                  | 5 & 6                                         |                                                       |
| 4. Identify the specific case(s) and justify the selection                                                                                    |                                               |                                                       |
| <b>Describing the data collection</b>                                                                                                         |                                               |                                                       |
| 5. Describe how data were collected                                                                                                           | 6 & 7                                         |                                                       |
| 6. Describe the sources of evidence used                                                                                                      | 6 & 7                                         |                                                       |
| 7. Describe any ethical considerations and obtainment of relevant approvals, access and permissions                                           | 7                                             |                                                       |
| <b>Describing the data analysis</b>                                                                                                           |                                               |                                                       |
| 8. Describe the analysis methods                                                                                                              | 7                                             |                                                       |
| <b>Interpreting the results</b>                                                                                                               |                                               |                                                       |
| 9. Describe any inherent shortcomings in the design and analysis and how these might have influenced the findings                             | 17                                            |                                                       |
| 10. Consider the appropriateness of methods used for the question and subject matter and why it was that qualitative methods were appropriate | 16 & 17                                       |                                                       |
| 11. Discuss the data analysis                                                                                                                 | 16 & 17                                       |                                                       |
| 12. Ensure that the assertions are sound, neither over- nor under-interpreting the data                                                       | 17                                            |                                                       |
| 13. State any caveats about the study                                                                                                         | 17                                            |                                                       |

From: Chapter 5, Translating high-consensus Delphi items into reporting standards for organisational case studies Developing a methodological framework for organisational case studies: a rapid review and consensus development process. Health Services and Delivery Research, No. 4.1. Rodgers M, Thomas S, Harden M, et al. Southampton (UK): [NIHR Journals Library](#); 2016 Jan

# BMJ Open

## WHAT IS THE CONTRIBUTION OF PHYSICIAN ASSOCIATES IN HOSPITAL CARE IN ENGLAND? A MIXED METHODS, MULTIPLE CASE STUDY.

|                                 |                                                                                                                                                                                                                                                                                                                                                                                                                                                                                                                                                                                                                                                                                                                                                                                                                                                                                                                                                                           |
|---------------------------------|---------------------------------------------------------------------------------------------------------------------------------------------------------------------------------------------------------------------------------------------------------------------------------------------------------------------------------------------------------------------------------------------------------------------------------------------------------------------------------------------------------------------------------------------------------------------------------------------------------------------------------------------------------------------------------------------------------------------------------------------------------------------------------------------------------------------------------------------------------------------------------------------------------------------------------------------------------------------------|
| Journal:                        | <i>BMJ Open</i>                                                                                                                                                                                                                                                                                                                                                                                                                                                                                                                                                                                                                                                                                                                                                                                                                                                                                                                                                           |
| Manuscript ID                   | bmjopen-2018-027012.R1                                                                                                                                                                                                                                                                                                                                                                                                                                                                                                                                                                                                                                                                                                                                                                                                                                                                                                                                                    |
| Article Type:                   | Research                                                                                                                                                                                                                                                                                                                                                                                                                                                                                                                                                                                                                                                                                                                                                                                                                                                                                                                                                                  |
| Date Submitted by the Author:   | 05-Dec-2018                                                                                                                                                                                                                                                                                                                                                                                                                                                                                                                                                                                                                                                                                                                                                                                                                                                                                                                                                               |
| Complete List of Authors:       | Drennan, Vari; Kingston University & St. George's University of London, Centre for Health & Social Care Research<br>Halter, Mary ; Kingston University & St. George's University of London, Centre for Health & Social Care Research<br>Wheeler, Carly; Kingston University & St. George's University of London<br>Nice, Laura; University of Birmingham, Institute of Clinical Sciences<br>Brearley, Sally; King's College London, Florence Nightingale Faculty of Nursing and Midwifery<br>Ennis, James; University of Birmingham<br>Gabe, Jonathan; Royal Holloway University of London<br>Gage, Heather; University of Surrey, School of Economics<br>Levenson, Ros; Independent consultant,<br>de Lusignan, Simon; University of Surrey, Department of Health Care Management and Policy; St. Georges University of London, Division of Population Health Sciences and Education<br>Begg, Phil; Royal Orthopaedic Hospital<br>Parle, James; University of Birmingham |
| <b>Primary Subject Heading</b>: | Health services research                                                                                                                                                                                                                                                                                                                                                                                                                                                                                                                                                                                                                                                                                                                                                                                                                                                                                                                                                  |
| Secondary Subject Heading:      | Health policy                                                                                                                                                                                                                                                                                                                                                                                                                                                                                                                                                                                                                                                                                                                                                                                                                                                                                                                                                             |
| Keywords:                       | Organisation of health services < HEALTH SERVICES ADMINISTRATION & MANAGEMENT, Physician associates, Physician assistants, workforce, hospitals, mixed methods                                                                                                                                                                                                                                                                                                                                                                                                                                                                                                                                                                                                                                                                                                                                                                                                            |
|                                 |                                                                                                                                                                                                                                                                                                                                                                                                                                                                                                                                                                                                                                                                                                                                                                                                                                                                                                                                                                           |

SCHOLARONE™  
Manuscripts

**TITLE PAGE****WHAT IS THE CONTRIBUTION OF PHYSICIAN ASSOCIATES IN HOSPITAL CARE IN ENGLAND? A MIXED METHODS, MULTIPLE CASE STUDY.****AUTHORS**

Vari M Drennan , Centre for Health & Social Care Research, Joint Faculty of Kingston University & St. George's University of London, London, UK \*

Mary Halter, Centre for Health & Social Care Research, Joint Faculty of Kingston University & St. George's University of London, London, UK

Carly Wheeler, Centre for Health & Social Care Research, Joint Faculty of Kingston University & St. George's University of London, London, UK

Laura Nice, Institute of Clinical Sciences, University of Birmingham, Birmingham, UK

Sally Brearley, patient and public involvement fellow, Centre for Public Engagement, Joint Faculty of Kingston University & St. George's University of London, London, UK

James Ennis, Institute of Clinical Sciences, University of Birmingham, Birmingham, UK

Jonathan Gabe, Criminology & Sociology, School of Law, Royal Holloway, University of London, Egham, Surrey, UK

Heather Gage, Surrey Health Economics Centre, Department of Clinical & Experimental Medicine, University of Surrey, Guildford, UK

Ros Levenson, Independent researcher, London, UK

Simon de Lusignan, Department of Clinical & Experimental Medicine, University of Surrey, Guildford, UK

Philip Begg, Royal Orthopaedic Hospital, Birmingham, UK

James Parle, Institute of Clinical Sciences, University of Birmingham, Birmingham, UK

\*Corresponding author

1  
2  
3 Vari M Drennan, Centre for Health & Social Care Research, Joint Faculty of Kingston  
4 University & St. George's University of London, Cranmer Terrace, London SW170RE.  
5  
6 [v.drennan@sgul.kingston.ac.uk](mailto:v.drennan@sgul.kingston.ac.uk) 0208 725 2339  
7  
8

9 **WORD COUNT,**

10  
11 4150 excluding title page, abstract, references, figures and tables.  
12  
13  
14  
15  
16  
17

18 **General subject**

19  
20 Health service research  
21  
22

23 **Browse by topic**  
24  
25  
26  
27

28 **KEY WORDS**

29  
30 Physician associates, physician assistants, manpower, workforce, health, hospital, mixed  
31 methods.  
32  
33  
34  
35  
36  
37  
38  
39  
40  
41  
42  
43  
44  
45  
46  
47  
48  
49  
50  
51  
52  
53  
54  
55  
56  
57  
58  
59  
60

## ABSTRACT

**Objectives:** to investigate the deployment of physician associates (PAs); the factors supporting and inhibiting their employment and their contribution and impact on patients' experience and outcomes and the organisation of services.

**Design:** mixed methods within a case study design, using interviews, observations, work diaries and documentary analysis.

**Setting:** six acute care hospitals in three regions of England in 2016-2017.

**Participants:** 43 PAs, 77 other health professionals, 28 managers, 28 patients and relatives.

**Results:** A key influencing factor supporting the employment of PAs in all settings was a shortage of doctors. PAs were found to be acceptable, appropriate and safe members of the medical/surgical teams by the majority of doctors, managers and nurses. They were mainly deployed to undertake inpatient ward work in the medical/surgical team during core weekday hours. They were reported to positively contribute to: continuity within their medical/surgical team, patient experience and flow, inducting new junior doctors, supporting the medical/surgical teams' workload, which released doctors for more complex patients and their training. The lack of regulation and attendant lack of authority to prescribe was seen as a problem in many but not all specialties. The contribution of PAs to productivity and patient outcomes was not quantifiable separately from other members of the team and wider service organisation. Patients and relatives described PAs positively but most did not understand who and what a PA was, often mistaking them for doctors.

**Conclusions:** This study offers new insights concerning the deployment and contribution of PAs in medical and surgical specialties in English hospitals. PAs provided a flexible addition to the secondary care workforce without drawing from existing professions. Their utility in the hospital setting is unlikely to be completely realised without the appropriate level of regulation and authority to prescribe medicines and order ionising radiation within their scope of practice.

## ARTICLE SUMMARY

### Strengths and limitations of this study,

- This is the first study of the contribution of PAs across multiple secondary care specialties in the National Health Service in England.
- A strength was the diversity within and across the six case study hospitals, including size, socio-economic setting, secondary and tertiary care specialties, and geographical location in three regions in England.
- The mix of qualitative and quantitative methods gathered and synthesised data from multiple perspectives and sources, supporting the trustworthiness and credibility of the findings.
- The difficulty of attributing processes, outcomes and costs to the inclusion of one specific professional in team-based acute clinical care limited our analysis in part.

## MAIN TEXT

### BACKGROUND

Health care systems internationally are faced with shortages of doctors and constraints on financial resources, set within a context of an ageing and growing global population. [1, 2] The combination of these factors has resulted in many countries developing mid-level, or advanced clinical practitioners (ACP). [3] ACPs have often been developed from the nursing workforce but in many countries there are other types of ACP roles; one such group are physician assistants (PAs) known as physician associates in the United Kingdom, UK). [4] PAs originated in the United States (US) in the 1960s and have spread to other countries such as Canada and the Netherlands. [4, 5] PAs are a new and rapidly growing occupational group in the UK National Health Service (NHS). [6] PAs are trained at a post-graduate level using the medical model to work in all settings and undertake physical examinations, investigations, diagnosis, and treatment within their scope of practice as agreed with their supervising doctor. [7] Currently, UK PAs cannot prescribe medicines or order ionising radiation, unlike PAs in countries such as the US and the Netherlands. [5, 8] A Department of Health public consultation on the regulation of medical associate professions in the UK, including PAs, will report in 2018. [9] PAs working in primary care in England have been found to complement the work of general practitioners and to be acceptable, appropriate, safe and efficient. [10] Patients reported PAs to provide good quality care but they did not all understand the role. [11] About 75% of PAs in the UK work in secondary care; [12] however, little is known about their contribution or impact. Pilot projects with American trained PAs working in the UK in 2006 and 2008 concluded that PAs assisted medical teams safely, worked at clinical assistant level, and were well received by patients. [13, 14] By 2015, 30 of 201 English NHS hospital trusts (the English term for an NHS provider organisation) were employing PAs [15] and a survey of medical directors in 2016 reported that 44 of 71 respondents were considering employing PAs. [16] While the spread of PAs in English hospitals suggests the role is seen as advantageous, there was little evidence available as to the deployment, acceptability, effectiveness and costs of PAs. This paper reports on an investigation into the deployment, acceptability, and impact of PAs in a purposive sample of six acute care hospital organisations in England. This investigation was part of a larger multi-



phase study. [17] The research questions addressed in the investigation were: how are PAs deployed in hospital medical and surgical teams and what supports or inhibits their inclusion? What is the contribution and impact of including PAs in hospital medical and surgical teams on the patients' experience and outcomes, on the organisation of services, working practices and relationships between professionals?

## METHODS

A mixed methods approach was undertaken in 2016-2017, using a case study design [18] in a purposive sample of six NHS acute care hospital trusts in England which employed PAs. The theoretical framing for the study drew on the work of Donabedian in assessing quality in health care using the dimensions of effectiveness, appropriateness, efficiency, acceptability and safety. [19] The study is reported using the consensus standards for organisational case studies (supplementary file 1). [20]

Potential case study sites were identified through a national survey of medical directors who indicated initial willingness to participate. [16] Final decisions were based on: achieving diversity in geographical location, size and type of acute hospitals, the willingness of PAs, consultants and managers to volunteer to participate, and, in order to ensure anonymity of individual participants, the same medical or surgical specialties had volunteer PAs in at least two case study sites. Chief executives and/or medical directors gave permission for the organisation to participate in the research. Characteristics of the case study sites in three regions of England are provided in Table 1 (adapted from Drennan et al. [17]).

Table 1: Case study site characteristics

| Hospital | Inpatient beds | Average full time equivalent doctors <sup>a</sup> | Annual income <sup>b</sup> | Type of Location (Office of National Statistics classification) <sup>c</sup> |
|----------|----------------|---------------------------------------------------|----------------------------|------------------------------------------------------------------------------|
| 1        | 1000+          | >1,001                                            | >£500 million              | Urban with Major Conurbation                                                 |
| 2        | 601-800        | <250                                              | <£200 million              | Urban with City and Town                                                     |
| 3        | 601-800        | 501-1,000                                         | £201 – 500 million         | Urban with City and Town                                                     |
| 4        | 1000+          | >1,001                                            | >£500 million              | Urban with Significant Rural                                                 |
| 5        | 601-800        | 251-500                                           | £201 – 500 million         | Urban with Major Conurbation                                                 |
| 6        | 201-400        | 251-500                                           | £201 – 500 million         | Urban with Major Conurbation                                                 |

Source of data: <sup>a</sup>,[21], <sup>b</sup> publicly available hospital annual reports , <sup>c</sup>[22].

Invitations for individual PAs to volunteer participate were through a combination of email from the organisations' lead clinicians for PAs and an on-site meeting for PAs and their consultants, called by the medical director or another lead clinician. At this meeting the research team presented the study, answered questions and invited potential volunteers to

1  
2  
3 provide contact details to which more information could be sent, including consent to  
4 participate forms.  
5

### 6 7 **Data collection** 8

9 Data collection comprised of semi-structured interviews, PA self-report work logs,  
10 observations of PAs, review of organisational documents, and requests for routine  
11 management information (data, reports, audits) on the work or impact of the PAs.  
12  
13

14  
15 Semi structured interviews were conducted with executive level managers, lead consultants,  
16 PAs and members of the health care teams in which PAs worked (medical, nursing, other  
17 staff), and patients and/or their relatives. Information and invitations to participate were sent  
18 to executive level managers by using publicly available contact details or via the medical  
19 director or named lead clinician for PAs at each site. Consultants and PAs approached other  
20 staff members in the first instance for permission for the research team to invite them to  
21 participate or the research team provided information and invitation directly through meeting  
22 staff members while conducting observations. All patients and relatives were approached in  
23 the first instance by the clinical team to request permission for the research team to provide  
24 information and invitation.  
25  
26  
27  
28  
29  
30  
31

32  
33 Senior clinicians and managers were asked questions on factors inhibiting and supporting  
34 employment of PAs, impact on the service organisation and patient outcomes as well as costs.  
35 Professionals were asked about deployment of PAs, acceptability, impact on working  
36 practices and contribution to patient experience. The topic guides for interviews of patients  
37 and relatives included questions about their experience as well as about the acceptability of  
38 the role. The topic guides are given as supplementary file 2. With permission, interviews  
39 were digitally recorded, or notes taken if preferred. Recordings were transcribed and  
40 anonymised. Thematic analysis was conducted using a constant comparative method by  
41 research team members and patient representatives. [23]. First, a sample of transcripts of  
42 different types of participants were read and open coded by five members of the team. In  
43 discussion the open codes were then grouped into axial codes; both levels then formed the  
44 first draft coding framework. This framework was then discussed by the whole research team  
45 using a second sample of transcripts and the coding framework adjusted. All transcripts were  
46 then analysed through the final coding framework using the NVIVO 11 software (QRS  
47 International Pty Ltd).  
48  
49  
50  
51  
52  
53  
54  
55  
56  
57  
58  
59  
60

1  
2  
3 PAs were invited to complete a seven day work log up to three times over the period of the  
4 study. These work logs were adapted from a previous study of PAs in England. [24] Data of  
5 the PA activities, the setting for the activity and time spent on each during each shift recorded  
6 were entered into Microsoft Excel and analysed descriptively.  
7  
8  
9

10 PAs were invited to be observed for up to three sessions by a researcher. For any PA  
11 volunteering, permission was also sought from their supervising consultant. The observations  
12 drew on the ethnographic tradition. [25] PAs sought assent from patients for the researcher to  
13 be present. Field notes of the PAs' activities and interactions were later written up and  
14 analysed. [26]  
15  
16  
17  
18  
19

20 Documentary analysis was undertaken of publicly available annual reports, board minutes  
21 and strategies. [23] Participant managers and clinicians were invited to share any relevant  
22 internal data or reports that could assist in answering the research questions, for example,  
23 patient throughput and outcome data and expenditure on medical locums. The intention, if  
24 data were available, was to compare before and after PAs were employed in a particular  
25 service.  
26  
27  
28  
29

30 The NHS Health Research Authority approval (IRAS project ID: 181193) and NHS London  
31 Central Research Ethics Committee (REC reference: 15/LO/1339) approval were obtained.  
32  
33  
34

### 35 **Patient and public involvement**

36  
37 The research questions and study design were initially informed by patient and public input  
38 from a previous study of PAs in primary care. [11,12] Patient and public involvement (PPI)  
39 in this study included: a PPI representative(SB) was a co-applicant and member of the  
40 research team, the study advisory group had two PPI representatives and was chaired by SB,  
41 PPI forums were established whose members gave input into research materials,  
42 interpretation of findings and dissemination. All PPI representatives attended an emerging  
43 findings seminar and received summaries of the findings.  
44  
45  
46  
47  
48  
49

### 50 **FINDINGS**

51  
52 The six case study sites employed approximately 70 PAs, and were recruiting more, in a wide  
53 range of adult and paediatric specialties. Forty-three PAs participated in the study, working in  
54 13 adult and paediatric specialties (including emergency departments). PAs provided data  
55 through interviews (n=41), observations (n= 82 sessions of 35 PAs) and work logs (18 PAs  
56  
57  
58  
59  
60

provided 107 days). The PAs had been qualified between one and nine years. A total of 175 interviews were conducted across the sites (table 2).

Table 2: Participants interviewed

| Type of participant                                              | Number interviewed |
|------------------------------------------------------------------|--------------------|
| Executive level managers and clinicians                          | 18                 |
| PAs                                                              | 41                 |
| Patients and relatives                                           | 28                 |
| Consultants (including those with lead responsibilities for PAs) | 24                 |
| Junior doctors                                                   | 17                 |
| Operational managers                                             | 11                 |
| Nurses                                                           | 28                 |
| Other types of staff e.g. allied health professions              | 8                  |
| Total                                                            | 175                |

Annual reports, workforce strategies and board minutes were collected for each hospital for the period of the study (n=139). The managers and clinicians were unable to provide any internal service or patient level data to assist in answering the research questions.

Findings from the different types of data have been combined to address the three research questions: the factors supporting and inhibiting their employment; the deployment of the PAs; and their contribution and impact on patients' experience, outcomes and the organisation of services.

### Factors influencing the decisions to employ PAs

The evidence here is drawn from the executive level interviews, from senior clinicians and operational managers and from documentary analysis. Necessity was the most commonly cited reason by the executive and senior clinicians for hospitals beginning to employ PAs in order to address four problems:

1. A decrease in the availability of junior doctors with a consequent over-reliance on locum doctors to cover medical shifts, with attendant concerns about high costs and patient safety,
2. Junior doctors not being able to undertake their training activities as they were being diverted to cover service rota gaps – an issue that had been the subject of a Deanery review in one hospital,
3. An increase in patient workload and consequent challenges in ensuring sufficient doctors available to cover the in-patient wards,

1  
2  
3 4. A need to improve the quality of care, this included the necessity to improve  
4 the quality performance of hospital as assessed by the Care Quality Commission  
5 (CQC).  
6  
7  
8  
9

10 The following exemplar illustrates the multiple factors leading to decisions to employ PAs

11  
12  
13 *“It was a very acute experience for us here at [name of hospital]...it began with a*  
14 *significant reduction in the number of junior doctors that we had available for our*  
15 *rotas, and we were getting increasingly concerned with lack of deanery appointments*  
16 *being made, last minute vacancies arising and a heavy reliance on locums. Also, at*  
17 *the same time we were [name of external assessment which reported problematic*  
18 *quality] with a lot of significant scrutiny and I recall my consultant team being very*  
19 *concerned about the whole integrity of the rota and continuity of medical workforce.”*  
20  
21

22 ID23 chief executive

23  
24  
25  
26  
27 The employment of PAs was only one amongst multiple workforce strategies being employed  
28 in all the hospitals to address these problems. Utilising PAs was considered advantageous as  
29 it did not deplete other staff groups.  
30  
31

32  
33 *“The workforce in every department is limited and so to move pharmacists or*  
34 *nursing staff across to do what have traditional previously been medical roles, means*  
35 *that we’re then robbing another profession of their workforce which they desperately*  
36 *need as well ...and that’s why we’ve looked to recruit PAs ”.* ID 46 medical director  
37  
38  
39

40  
41 In most of the hospitals, the impetus to employ PAs had come from individual specialties  
42 within clinical directorates, rather than an executive led initiative. At the start of the study  
43 period, two of the hospitals had documented executive level support and engagement with the  
44 introduction and education of PAs as well as production of public information about their  
45 PAs. By the end of the study five of the hospitals had documented executive level support for  
46 workforce planning strategies which included increased PA numbers in support of their  
47 medical establishment.  
48  
49  
50  
51

52  
53 The chief inhibiting factor to PA employment stated was the lack of regulation and attendant  
54 lack of authority to prescribe medicines and order ionising radiation.  
55  
56  
57  
58  
59  
60

1  
2  
3 *“Prescribing is the Achilles’ heel of the physician associate; not being able to*  
4 *prescribe has meant that their essential contribution of hours has been less than we*  
5 *would have wanted it.”* ID 48 medical director  
6  
7

8  
9 However, for many, this lack of regulation was reported as an issue to be addressed rather  
10 than an absolute inhibitory factor:  
11

12  
13 *“The only, the one challenge we have of course is the prescribing issue, or the lack of*  
14 *prescribing, yes, but no, generally, they’re [the PAs] a very helpful, positive addition*  
15 *to our staffing”.* ID 55 chief operations officer  
16  
17

18  
19  
20  
21 *“Now quite frankly it is absolutely bonkers to me that they [PAs] can put, you know, a*  
22 *chest drain in a patient but they can’t prescribe paracetamol...we need to do this*  
23 *[regulation] for this group of people [PAs] and just get on with it, “* ID 28 chief  
24 executive  
25  
26  
27

28  
29  
30 While negative attitudes of some senior doctors and nurses were reported as initial inhibiting  
31 factors to employing PAs, this was reported to change over time as PAs became part of teams  
32 and demonstrated what they could contribute. Many senior staff reported that interest in  
33 having PAs in medical/surgical teams spread amongst the consultants once they observed  
34 PAs in other teams and at work.  
35  
36  
37

### 38 39 40 **The deployment of PAs**

41  
42 The evidence here is drawn from the work logs, interviews and observations. The PAs  
43 described themselves as belonging to the medical/surgical team, and their place in work rotas  
44 reflected this, with their main working hours being daytime on weekdays. Most PAs  
45 described their main work taking place on the ward or unit and this was evident from the  
46 work logs and observations. Only a small number of PAs undertook any work in outpatients  
47 or operating theatres and if so for a small percentage of their time (Figure 1).  
48  
49  
50  
51

52  
53 

---

Figure 1 about here  

---

54  
55 Figure 1 Working setting for PAs as a percentage of their work hours recorded on worklogs  
56  
57  
58  
59  
60

1  
2  
3 The core role of the PAs in all adult and paediatric specialties (apart from those working in  
4 the ED) was to undertake ward-based work for the medical/surgical team (Table 3). This  
5 ward-based work was described and observed to include: participating in and following up  
6 ward rounds and patient reviews led by doctors; clerking and assessment of patients;  
7 preparing for, responding to requests and concerns about patients from nursing staff, and  
8 communicating with patients and relatives. Twenty and 18 per cent of the PAs time, working  
9 in surgical and medical specialties [adult and paediatric excluding those in the ED]  
10 respectively, was spent in ordering tests, preparing discharge summaries and administration  
11 (Table 3).  
12  
13  
14  
15  
16  
17  
18  
19  
20  
21  
22  
23  
24  
25  
26  
27  
28  
29  
30  
31  
32  
33  
34  
35  
36  
37  
38  
39  
40  
41  
42  
43  
44  
45  
46  
47  
48  
49  
50  
51  
52  
53  
54  
55  
56  
57  
58  
59  
60

For peer review only

Table 3 Physician associates' time (recorded in work logs) spent on individual work activities, by surgical and medical specialties.

| Activity                                                                                 | Surgical specialties * |                        |                                     | Medical specialties ~ |                        |                                     |
|------------------------------------------------------------------------------------------|------------------------|------------------------|-------------------------------------|-----------------------|------------------------|-------------------------------------|
|                                                                                          | Total hours            | Mean (SD) weekly hours | Percentage of total hours overall # | Total hours           | Mean (SD) weekly hours | Percentage of total hours overall # |
| Inpatient ward round (with consultant/registrar)                                         | 84                     | 7.64 (4.07)            | 14%                                 | 61                    | 6.1 (2.95)             | 15%                                 |
| Inpatient ward round (independent)                                                       | 13.25                  | 1.2 (1.59)             | 2%                                  | 57.75                 | 5.78 (3.07)            | 14%                                 |
| Inpatient clerking of new patients                                                       | 30.25                  | 2.75 (2.82)            | 5%                                  | 19.5                  | 1.95 (1.79)            | 5%                                  |
| Inpatient reviewing patients                                                             | 42.5                   | 3.86 (4.8)             | 7%                                  | 69.75                 | 6.98 (6.23)            | 17%                                 |
| Inpatient pre/post-operative assessment                                                  | 14.5                   | 1.32 (1.8)             | 2%                                  | 0.5                   | 0.05 (0.16)            | <1%                                 |
| Inpatient discussion of patient care/case management with clinical colleagues            | 41                     | 3.73 (2.84)            | 7%                                  | 27.25                 | 2.72 (3.18)            | 7%                                  |
| Outpatient clerking new patients                                                         | 3                      | 0.27 (0.9)             | 1%                                  | 1.5                   | 0.15 (0.34)            | <1%                                 |
| Outpatient patient consultation                                                          | 23.25                  | 2.11 (3.02)            | 4%                                  | 3.75                  | 0.38 (1.19)            | 1%                                  |
| Outpatient pre-operative assessment                                                      | 0.75                   | 0.07 (0.23)            | <1%                                 | -                     | -                      | -                                   |
| Outpatient discussion of patient care/case management with clinical colleagues           | 0.5                    | 0.05 (0.15)            | <1%                                 | 4.25                  | 0.42 (1.34)            | 1%                                  |
| Emergency department clerking new patients                                               | 3.25                   | 0.3 (0.43)             | 1%                                  | 5                     | 0.5 (1.58)             | 1%                                  |
| Emergency department patient consultation                                                | 1.25                   | 0.11 (0.26)            | <1%                                 | -                     | -                      | -                                   |
| Emergency department discussion of patient care/case management with clinical colleagues | 0.75                   | 0.07 (0.16)            | <1%                                 | 5                     | 0.5 (1.58)             | 1%                                  |
| Assisting in theatre/interventional procedures                                           | 66.25                  | 6.02 (6.28)            | 11%                                 | 11.25                 | 1.12 (1.46)            | 3%                                  |
| Patient education (any setting)                                                          | 14.25                  | 1.3 (1.52)             | 2%                                  | 8                     | 0.8 (1.25)             | 2%                                  |
| Discussing care with relatives (any setting)                                             | 12.5                   | 1.14 (1.07)            | 2%                                  | 28.75                 | 2.88 (2.21)            | 7%                                  |
| Routine procedures (e.g. phlebotomy, cannulation, ECG) (any setting)                     | 34.25                  | 3.11 (2.13)            | 6%                                  | 26.75                 | 2.68 (1.2)             | 7%                                  |
| TTOs and discharge summaries (any setting)                                               | 59                     | 5.36 (4.4)             | 10%                                 | 34.5                  | 3.45 (2.37)            | 8%                                  |
| Requesting investigations (any setting)                                                  | 33.75                  | 3.07 (2.78)            | 6%                                  | 20.75                 | 2.08 (1.65)            | 5%                                  |
| Administration                                                                           | 24.25                  | 2.2 (3.82)             | 4%                                  | 2.5                   | 0.25 (0.58)            | 1%                                  |
| Teaching                                                                                 | 22.5                   | 2.04 (2.49)            | 4%                                  | 10.5                  | 1.05 (1.46)            | 3%                                  |
| Own training/study                                                                       | 14.5                   | 1.32 (2.22)            | 2%                                  | 2.5                   | 0.25 (0.49)            | 1%                                  |
| Networking/attending meetings                                                            | 15.5                   | 1.41 (1.86)            | 3%                                  | 1.75                  | 0.18 (0.37)            | <1%                                 |
| Strategy/Policy/Service Development                                                      | 2.75                   | 0.25 (0.58)            | <1%                                 | 2.5                   | 0.25 (0.79)            | 1%                                  |
| Other <sup>^</sup>                                                                       | 31.75                  | 2.89 (4.24)            | 5%                                  | 1                     | 0.1 (0.32)             | <1%                                 |
| Total                                                                                    | 589.5                  | 53.59 (11.68)          | n/a                                 | 406                   | 40.6 (12.78)           | n/a                                 |

\* N=10 participants, ~ N= 6 participants, # due to rounding, percentages may not add up to 100%, ^ "Other" activities included: collecting notes, surgical planning meeting, interpreting investigations, ward list/pre-operative, multi-disciplinary team, airway support & assisting intubation, telephone clinic, university teaching, ECG electrocardiogram; SD standard deviation; TTOs to take out,



1  
2  
3 In the ED setting the PAs worked in the major, and sometimes minors, sections where they  
4 were described and observed to be assigned to undertake patient assessments (following  
5 clinical triage) and, as agreed by the senior supervising doctor after presentation of each  
6 patient assessment, order investigations and formulate management and treatment plans.  
7  
8 They were observed to work as part of the multidisciplinary team alongside junior doctors  
9 and other advanced clinical practitioners, who reported similarly to the senior doctor.

10  
11 Individual PA roles were described and observed to be moulded to the need of a service and  
12 that over time some PAs had been trained to undertake procedures common for that speciality  
13 such as lumbar punctures, echo cardiograms, peripherally inserted central lines or nerve  
14 blocks.

15  
16 Consultants and managers reported that PAs were primarily deployed to help address gaps in  
17 medical rotas.

### 18 19 20 21 22 23 24 25 26 **The contribution and impact of including PAs in medical/surgical teams to** 27 **patients' experience**

28  
29 Patients and relatives reported very positive views of the PAs attending them. Particular  
30 aspects mentioned were: the PA's constant presence on the ward meant they were easy to  
31 approach and PAs followed up items from the doctor's ward round and spent time explaining  
32 decisions and management plans to the patients and relatives.

33  
34  
35  
36  
37 *"... he's [the PA] been quite instrumental in helping me understand things because*  
38 *when doctors come they say things that people are writing down and then they walk*  
39 *away and you find out that they have changed your medication and obviously I need*  
40 *an answer as to why, so I go to him and he explains"* ID143 patient

41  
42  
43  
44  
45 Many of those interviewed and observed were uncertain about what a PA was or mistook  
46 them for a doctor, despite the PA or the consultant introducing them as a PA:

47  
48  
49 *"I thought she was a doctor. But is she?" ....she came to see me, and I was perfectly*  
50 *happy with her expertise and everything else, so I don't want to give the wrong*  
51 *impression. But I had other things on my mind [than] to ask what her actual title*  
52 *was."* ID 106 patient

53  
54  
55  
56 All of the patients and relatives reported that they saw the PAs working within the  
57 medical/surgical team, PAs provided good care, and referred back to senior doctors. All  
58 patients and relatives interviewed were content to be attended to by a PA in the future.  
59  
60

1  
2  
3 Many of the health professional and managerial participants voluntarily offered information on  
4 the high volume of compliments and presents the PAs received from patients.  
5  
6

### 7 **The contribution and impact on outcomes and the organisation of services of** 8 **including PAs in medical/surgical teams: the professionals' view** 9

10  
11 The majority of doctors, nurses and managers described the contribution of PAs as positive.  
12

13  
14 *“They work alongside our junior doctors, support the junior doctors, and are*  
15 *clinically very valuable. Well, almost invaluable now.”* ID 185 consultant  
16

17  
18 *“They're {PAs} a really valuable asset in the department now and we're looking at*  
19 *expanding, seeing how we can have more [PAs] in the department to help.”* ID 205  
20  
21 operational manager  
22

23  
24 A small number of doctors and nurses in high dependency specialities considered that, having  
25 employed or worked with PAs, doctors were more suited to the work of the speciality. The  
26 extent to which the PAs' lack of authority to prescribe was influential in this was unclear.  
27

28  
29 The reported positive contribution of PAs was grouped into themes of: providing continuity,  
30 aiding patient flow, supporting patient safety and releasing doctor time for more complex  
31 patients and training, which we now discuss in turn.  
32  
33

#### 34 35 **Continuity** 36

37  
38 One of the most frequently reported impacts on the organisation was that PAs provided  
39 continuity of staffing in the medical/surgical team i.e. personal and team continuity. They  
40 provided continuity in presence and continuity in knowledge and relationships which was  
41 reported as beneficial to patients, nurses and doctors in these ways:  
42  
43

- 44  
45 • Continuity in presence on the in-patient wards which increased access and early  
46 escalation of problems to the medical/surgical team for nurses: *“If we need any form*  
47 *of escalation, getting in touch with doctors, we can also get in touch with the PAs, the*  
48 *PAs chase the doctors, so their role is quite significant as well. ...to get things going*  
49 *so patients are not left for long hours waiting for a doctor because doctors are doing*  
50 *other things, doctors are in theatres. They're like the middle person who get things*  
51 *done between both sides, nurses and doctors.”* ID 71 senior nurse  
52  
53
- 54  
55 • Continuity in knowledge about current in-patient status, management plans and  
56 patients' progress, which facilitated updating patients and the medical/surgical team:  
57  
58  
59  
60

1  
2  
3  
4  
5  
6  
7  
8  
9  
10  
11  
12  
13  
14  
15  
16  
17  
18  
19  
20  
21  
22  
23  
24  
25  
26  
27  
28  
29  
30  
31  
32  
33  
34  
35  
36  
37  
38  
39  
40  
41  
42  
43  
44  
45  
46  
47  
48  
49  
50  
51  
52  
53  
54  
55  
56  
57  
58  
59  
60

“It’s that continuity, like I’ve been on call so I’ve not been on the ward for five days, I’m like ‘what’s going on?’ and they’re [PAs] like ‘seven and five are the sick ones and ten is the one we’re trying to get out’. And like they know that and that’s very helpful.” ID 207 foundation year doctor

- Continuity in knowledge about the policies and practices (clinical and otherwise) of the department, the individual consultants and the hospital which was reported to be of particular value for doctors on short training rotations new to that particular workplace. “Our SHO equivalent doctors rotate all the time... so what they [the PAs] really provide is this amazing continuity of how the system works ... how we care for patients who’ve had [specialty] procedures, how we manage patients with different [specialty] conditions.” ID51 registrar

### **Aiding patient flow**

PAs were described and observed to undertake large amounts of non-patient facing clinical work for the medical /surgical team. All participants reported PAs helped smooth and improve patient flow.

“to liaise within teams, to liaise with other departments, to book a test, to get in touch with a GP, to book a bed for a patient which [sic] is frail and elderly, which [sic] need antibiotics a few days before, comes from far away, ... and they [the PAs] can really help for that organisational aspect a lot, and also help in the more clinical aspect... I think they [the PAs] smooth things out with many issues that need to be prepared and planned for.” ID 95 registrar

“PAs provide ward cover so discharge summaries are completed on time, meaning patients leave hospital without delay and bed capacity is released for other patients.” ID 81 operational manager.

One manager described the PAs as ‘oil’ in the system, while a consultant likened the work of the PAs to ‘the glue’ within the medical/surgical team.

### **Releasing doctors time**

The presence of a PA in the team was considered to release the doctors’ time to attend more complex patients and also to attend patients in outpatients and theatre.

1  
2  
3  
4  
5  
6  
7  
8  
9  
10  
11  
12  
13  
14  
15  
16  
17  
18  
19  
20  
21  
22  
23  
24  
25  
26  
27  
28  
29  
30  
31  
32  
33  
34  
35  
36  
37  
38  
39  
40  
41  
42  
43  
44  
45  
46  
47  
48  
49  
50  
51  
52  
53  
54  
55  
56  
57  
58  
59  
60

*“They’re [PAs] just great at coming in and just taking off those little jobs that will really slow you down unnecessarily and paving the way for the more important sicker patients to get more of your time and attention.”* ID 12 core training doctor

However, caveats were offered in that in some specialties efficiencies of the role were not fully realised due to lack of authority to prescribe.

*“It’s [lack of authority to prescribe medicines] a real hindrance, because somebody’s then got to do it. So we want to discharge a patient, we’ve all agreed that’s what they need doing, somebody of course needs to write up their drugs..... the PA’s doing all the discharge planning and everything else, but can’t do this bit, so then has to wait for a junior doctor to come along and do it.”* ID 185 consultant

Some registrars gave estimates that the PAs, without authority to prescribe, could cover about 70% of the work required.

### **Patient safety**

All consultants, registrars and managers reported the PAs to be safe with no serious incidents or patient complaints. Many of the doctors reported that the PAs were careful to work within their capabilities and within guidelines and appropriately refer to the doctors within the team. The continuity PAs provided, as described above, was viewed as important in patient safety. In some services the PAs’ duty times were arranged to cover for absences of doctors e.g. to attend training and reduce the use of locum doctors. Consultants and managers considered locum doctors that were new to their service as less efficient, less safe, and costlier than PAs.

*“Better for patient safety to have the PAs than using people that you don’t know, locums coming in can create chaos.”* ID 114 consultant

### **Quantifying the impact**

When asked to quantify the impact of the PAs, all the senior clinicians and managers pointed out that it was hard to separate out the individual from the overall large, multi-disciplinary team (s) delivering acute care. Those that were able to offer views did so anecdotally describing reduction in spending on locum doctors, improved use of senior clinicians’ time and greater productivity of the medical/surgical team:

*“We have had to spend more money on [locum] doctors when we don’t have PA cover, just to double up so it’s safe.”* ID203 operational manager

1  
2  
3 “PAs assisting in theatres – this has seen a reduction in theatre cancellations and  
4 increased efficiency due to a lack of junior doctors being available to assist. Resulting  
5 in reduced wait times and complaints, and income generation”. ID81 operational  
6 manager  
7  
8  
9

## 10 11 **DISCUSSION**

12  
13 This study offers new insights as to the deployment and contribution of PAs in a range of  
14 medical and surgical specialties in English NHS hospitals. PAs were found to be acceptable,  
15 appropriate and safe members of the medical/surgical teams by the majority of the doctors,  
16 managers and nurses. They were mainly deployed to undertake inpatient ward work in the  
17 medical/surgical team during core weekday hours. They were reported to contribute  
18 positively to continuity in the medical/surgical team, to patient experience and flow, to  
19 inducting new junior doctors, and supporting the medical/surgical teams’ workload thus  
20 releasing doctors for attending the more complex patients and for their training. The  
21 continuity that PAs brought to medical/surgical teams was viewed as more useful and safer  
22 than employing locum doctors, who were also reported as costlier to the service than PAs.  
23 There were suggestions that some PAs increased senior clinicians’ productivity. The finding  
24 of PAs practicing safely has also been reported in a systematic review. [27] Observations on  
25 the continuity that PAs provide within medical/surgical teams have been made in North  
26 America and the Netherlands. [28, 29] and in the US regarding releasing doctors to undertake  
27 training. [30]

28  
29 Patients and relatives reported that they viewed PAs and their contribution positively but  
30 most did not understand what a PA was. Patients have been reported to have higher levels of  
31 satisfaction from hospital teams which included PAs compared to those without in the  
32 Netherlands. [31]. Patient confusion about the PAs role has been reported before in the  
33 primary care setting. [32]

34  
35 The contribution of PAs to productivity, patient experience and outcomes was not  
36 quantifiable separately from other members of the team and wider service organisation. This  
37 finding has also been reported in the US. [33] The lack of authority to prescribe and order  
38 ionising radiation was reported as an inhibiting factor to their employment and meant that in  
39 some specialties the full potential of PAs could not be realised. A Dutch study, where PAs  
40 have authority to prescribe, reported no difference in cost-effectiveness of in-patient care  
41 between teams with and without PAs. [34]

## Strengths and limitations

The strength of this study was that it was undertaken in different types of hospitals, across different specialities and a large number of PAs. The mixed methods case study approach gave qualitative insights from a wide range of stakeholders and illuminated the quantitative data from PA work logs. The main limitations were the low response rate in providing work logs, which we understood was a result of workload pressures, and that participants were either not aware or were unable to access and provide to the research team quantitatively measurable data on the effect of the introduction of PA on patient outcomes or human resource expenditure. In addition, attribution of changes in quality of patient care, patient safety events or cost savings to the introduction of PAs was problematic when such introduction commonly went alongside other changes or response to other significant events such as unprecedented surges in demand and workforce shortages. [35, 36] However, we were able to describe and scope the range of potential impacts. These might be explored in more depth in future studies using matched comparisons of medical/surgical teams as in a Dutch study [32], or in a 'step-wedge' design (where the change is introduced sequentially in all sites so that all 'participants' get the intervention, but not simultaneously).

## CONCLUSION

Planning and developing a medical and surgical workforce can be challenging. Achieving a sustainable medical workforce with the right balance of consultants, specialty doctors (i.e. not in training posts) and junior doctors has to take account of: a) the service demands, b) the training requirements for career advancement and c) the creation of manageable jobs within interesting careers. Having a cadre of flexible, advanced clinical practitioners trained in the medical model, who can support doctors may help address inherent tensions between service demands, training requirements and budgetary constraints, as well as mitigate against cyclical shortages. PAs could provide a flexible addition to the secondary care workforce without drawing from existing professions. PAs may provide personal and team continuity not provided by junior doctors, who frequently rotate to new training posts. Many experienced clinicians valued this continuity more highly than the service delivered by locum doctors unfamiliar with the setting. However, PAs' utility in the hospital setting is unlikely to be fully realised without the appropriate level of regulation with attendant authority to prescribe medicines and order ionising radiation within their scope of practice.

## ACKNOWLEDGEMENTS

Our thanks to all the patient and staff participants who generously gave their time and views during a period when there were many pressures and demands on NHS services.

### Funding statement

This project was funded by the National Institute for Health Research Health Services and Delivery Research Programme (project number 14/19/26). This paper presents independent research commissioned by the National Institute for Health Research (NIHR). The views and opinions expressed by authors in this publication are those of the authors and do not necessarily reflect those of the NHS, the NIHR, the Health Service and Delivery Research Programme or the Department of Health.

### Competing interests statement

SdL is head of the Department of Clinical and Experimental Medicine at the University of Surrey, which launched a physician associate course in 2016. JP chairs the UK and Ireland Board for Physician Associate Education and was director of the physician associate course at the University of Birmingham. PB is honorary faculty at the University of Birmingham and has taught on the physician associate programme since 2008. JE teaches part time on the University of Birmingham physician associate course.

### Authors contribution

Conception, design and receiving funding for the study: VMD, MH, SB, SdL, HG, JG, PB, JE, JP. Lead for PPI: SB. Acquisition of the data: CW, LN, JE, RL, MH, VMD. Analysis and interpretation of the data, drafting and critical revision of the manuscript for important intellectual content, accountable for all aspects of the work and approval of the final manuscript: VMD, MH, CW, LN, RL, SB, SdL, HG, JG, PB, JE, JP.

### Data sharing statement

No additional data are available

**REFERENCES**

1. World Health Organisation. Global strategy on human resources for health: Workforce 2030. 2016. URL [http://www.who.int/hrh/resources/pub\\_globstrathrh-2030/en/](http://www.who.int/hrh/resources/pub_globstrathrh-2030/en/) Access April 2018
2. OECD. Fiscal Sustainability of Health Systems: Bridging Health and Finance Perspectives, 2015 OECD Publishing, Paris, <http://dx.doi.org/10.1787/9789264233386-en>. Accessed April 2018
3. Global Health Workforce Alliance. Mid-level health workers for delivery of essential health services. A global systematic review and country experiences. 2013. Reference no. WHO/hss/hwa/mlp 2013/ENG. World Health Organisation. <http://www.who.int/workforcealliance/knowledge/resources/mlp2013/en/> Accessed April 2018
4. Rick TJ, Ballweg R. Physician Assistants and the Expanding Global Health-Care Workforce. *The American journal of tropical medicine and hygiene*, 2017. 97:643-644.
5. Cawley JF, Hooker RS. Physician assistants in American medicine: the half-century mark. *The American Journal of Managed Care*. 2013; 19:e333-41.
6. Aiello M, Roberts KA. Development of the United Kingdom physician associate profession. *Journal of the American Academy of Physician Assistants*. 2017; 30:1-8.
7. Department of Health. The Competence and Curriculum Framework for the Physician Assistant. London: Department of Health 2006. URL: [http://webarchive.nationalarchives.gov.uk/+http://www.dh.gov.uk/en/Publicationsandstatistics/Publications/PublicationsPolicyAndGuidance/DH\\_4139317](http://webarchive.nationalarchives.gov.uk/+http://www.dh.gov.uk/en/Publicationsandstatistics/Publications/PublicationsPolicyAndGuidance/DH_4139317) (accessed April 2018).
8. Netherlands Association of Physician Assistants. Independency of Physician Assistants and Nurse Practitioners regulated in the Netherlands. 2017. URL <https://www.napa.nl/english/> (accessed April 2018).
9. Department of Health. Open Consultation. The regulation of medical associate professions in the UK. Published 12 October 2017. URL [www.gov.uk/government/consultations/regulating-medical-associate-professions-in-the-uk](http://www.gov.uk/government/consultations/regulating-medical-associate-professions-in-the-uk) (accessed December 2017).
10. Ritsema TS. Faculty of Physician Associates Census Results. 2017. 2017 <http://www.fparcp.co.uk/about-fpa/fpa-census> (accessed April 2018).



- 1  
2  
3 11. Drennan VM, Halter M, Joly L et al. Physician associates and GPs in primary care: a  
4 comparison. *Br J Gen Pract*. 2015 65(634):e344-50.  
5  
6
- 7 12. Halter M, Drennan VM, Joly LM et al. Patients' experiences of consultations with  
8 physician associates in primary care in England: A qualitative study. *Health Expectations*.  
9 2017; 20:1011-1019. <https://doi.org/10.1111/hex.12542>  
10  
11
- 12 13. Woodin J, McLeod H, McManus R, et al. Evaluation of US-trained physician  
13 assistants working in the NHS in England. Final Report. Birmingham UK, University of  
14 Birmingham, 2005.  
15  
16
- 17 14. Farmer J, Currie M, Hyman J et al. Evaluation of physician assistants in National  
18 Health Service Scotland. *Scott Med J*. 2011 56(3):130-4. doi: 10.1258/smj.2011.011109.  
19  
20
- 21 15. Ritsema T. UK Physician Associates Association (UKAPA). 2015 Census Results.  
22 London: Faculty of Physician Associates. 2015. Accessed last 3-10-2018 at  
23 <http://www.fparcp.co.uk/about-fpa/fpa-census>  
24  
25
- 26 16. Halter M, Wheeler C, Drennan VM et al. Physician associates in England's hospitals:  
27 a survey of medical directors exploring current usage and factors affecting recruitment. *Clin*  
28 *Med (Lond)*. 2017 2:126-131. doi: 10.7861/clinmedicine.17-2-126.  
29  
30
- 31 17. Drennan VM, Halter M, Wheeler C et al. Investigating the contribution of physician  
32 associates to secondary care in England: a mixed methods study (the PA-SCER study). NIHR  
33 Health Service & Delivery Research. 2018 *in press*  
34  
35
- 36 18. Yin RK. *Case Study Research and Applications: Design and Methods*. 6th Ed.  
37 Thousand Oaks, California: Sage Publications Inc. 2018.  
38  
39
- 40 19. Donabedian A. The quality of care. How can it be assessed? *JAMA* 1988; 260:1743-  
41 1748.  
42  
43
- 44 20. Rodgers M, Thomas S, Harden M et al. Developing a methodological framework for  
45 organisational case studies: a rapid review and consensus development process. *Health Serv*  
46 *Deliv Res* 2016;4(1) doi.org/10.3310/hsdr04010.  
47  
48
- 49 21. NHS Digital, NHS Hospital & Community Health Service (HCHS): HCHS doctors,  
50 by grade and organisation, in NHS Trusts and CCGs in England, as at 31 January to 31  
51 December 2016, average full time equivalent. <https://digital.nhs.uk/catalogue/PUB23470>.  
52  
53  
54  
55  
56  
57  
58 (Accessed May 2018).  
59  
60

- 1  
2  
3 22. Department for Environment, Food & Rural Affairs. Official Statistics 2011. Rural-  
4 Urban Classification of Local Authorities and other geographies. 2014.  
5  
6 [www.gov.uk/government/statistics/2011-rural-urban-classification-of-local-authority-and-](http://www.gov.uk/government/statistics/2011-rural-urban-classification-of-local-authority-and-other-higher-level-geographies-for-statistical-purposes)  
7  
8 [other-higher-level-geographies-for-statistical-purposes](http://www.gov.uk/government/statistics/2011-rural-urban-classification-of-local-authority-and-other-higher-level-geographies-for-statistical-purposes) (accessed May 2018).  
9
- 10 23. Boyatzis RE. Transforming qualitative information: Thematic analysis and code  
11 development. Thousand Oaks, Calif.: Sage; 1998.  
12  
13 24. Drennan V, Halter M, Brearley S et al. Investigating the contribution of physician  
14 assistants to primary care in England: a mixed-methods study. *Health Serv Deliv Res* 2014;2  
15 (16) DOI: 10.3310/hsdr02160 Accessed last May 2018 at  
16  
17 <https://www.journalslibrary.nihr.ac.uk/hsdr/hsdr02160/#/abstract>  
18  
19 25. Pope C, Mays N. Observational methods p 32-42. in Pope C. Mays, N. editors.  
20 *Qualitative research in health care*. 4th edn. Chichester: John Wiley & Sons; 2008.  
21  
22 26. McCann, L, Granter E, Hyde P et al. Still Blue-Collar after all these Years? An  
23 Ethnography of the Professionalization of Emergency Ambulance Work. *Journal of*  
24 *Management Studies* 2013; 50:750–776.  
25  
26 27. Halter M, Wheeler C, Pelone F et al. Contribution of physician assistants/associates to  
27 secondary care: a systematic review. *BMJ Open*. 2018 8(6):e019573. doi: 10.1136/bmjopen-  
28 2017-019573.  
29  
30 28. Kartha A, Restuccia JD, Burgess JF et al. Nurse practitioner and physician assistant  
31 scope of practice in 118 acute care hospitals. *Journal of Hospital Medicine*. 2014;9:615-20.  
32  
33 29. Timmermans MJ, van Vught AJ, Van den Berg M et al. Physician assistants in  
34 medical ward care: a descriptive study of the situation in the Netherlands. *Eval Clin Pract*.  
35 2016 22:395-402. <https://doi.org/10.1111/jep.12499>  
36  
37 30. Stahlfeld KR, Robinson JM, Burton EC. What do physician extenders in a general  
38 surgery residency really do? *J Surg Educ*. 2008; 65:354-8.  
39  
40 <https://doi.org/10.1016/j.jsurg.2008.06.002>  
41  
42 31. Timmermans MJC, van Vught AJ, Peters YAS, et al. The impact of the  
43 implementation of physician assistants in inpatient care: A multicenter matched-controlled  
44 study. *PLoS ONE* 2017; 12 (8):e0178212. <https://doi.org/10.1371/journal.pone.0178212>  
45  
46  
47  
48  
49  
50  
51  
52  
53  
54  
55  
56  
57  
58  
59  
60

- 1  
2  
3 32. Halter M, Drennan VM, Joly LM, et al. Patients' experiences of consultations with  
4 physician associates in primary care in England: A qualitative study. *Health Expectations*.  
5 2017; 20:1011-1019.  
6  
7  
8  
9 33. Moote M, Krsek C, Kleinpell R et al. Physician assistant and nurse practitioner  
10 utilization in academic medical centers. *Am J Med Qual*. 2011; 26:452-60  
11 <https://doi.org/10.1177/1062860611402984>  
12  
13  
14 34. Timmermans MJC, van den Brink GT, van Vught AJ, et al. The involvement of  
15 physician assistants in inpatient care in hospitals in the Netherlands: a cost-effectiveness  
16 analysis. *BMJ Open*. 2017; 7:e016405. doi: 10.1136/bmjopen-2017-016405.  
17  
18  
19 35. House of Commons. NHS Winter Pressures: 2017/18 Summary Commons Briefing  
20 Papers. Commons Briefing papers CBP-8210. URL  
21 <https://researchbriefings.parliament.uk/ResearchBriefing/Summary/CBP-8210> (accessed last  
22 20th June 2018).  
23  
24  
25  
26  
27 36. BBC News. Thousands of NHS nursing and doctor posts lie vacant. 29 February  
28 2016. URL <http://www.bbc.co.uk/news/health-35667939> (accessed last 20th June 2018).  
29  
30  
31  
32  
33  
34  
35  
36  
37  
38  
39  
40  
41  
42  
43  
44  
45  
46  
47  
48  
49  
50  
51  
52  
53  
54  
55  
56  
57  
58  
59  
60

1  
2  
3  
4  
5  
6  
7  
8  
9  
10  
11  
12  
13  
14  
15  
16  
17  
18  
19  
20  
21  
22  
23  
24  
25  
26  
27  
28  
29  
30  
31  
32  
33  
34  
35  
36  
37  
38  
39  
40  
41  
42  
43  
44  
45  
46  
47  
48  
49  
50  
51  
52  
53  
54  
55  
56  
57  
58  
59  
60

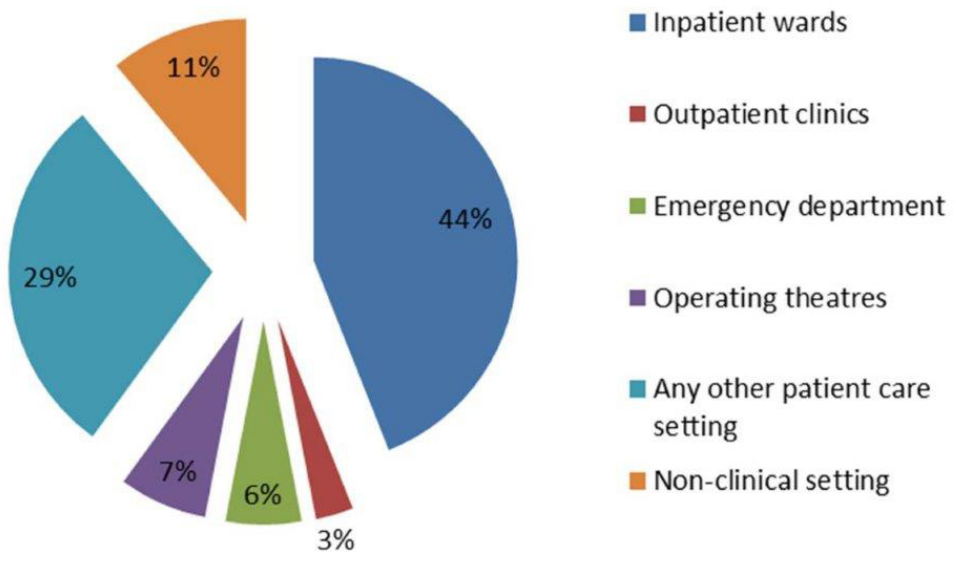

Figure 1 Working setting for PAs as a percentage of their work hours recorded on worklogs

## Supplementary file 1

## Consensus standards for the reporting of organisational case studies

| <b>Reporting item</b>                                                                                                                         | <b>Page number on which item was reported</b> | <b>Page number of justification for not reporting</b> |
|-----------------------------------------------------------------------------------------------------------------------------------------------|-----------------------------------------------|-------------------------------------------------------|
| <b>Describing the design</b>                                                                                                                  |                                               |                                                       |
| 1. Define the research as a case study                                                                                                        | 6                                             |                                                       |
| 2. State the broad aims of the study                                                                                                          | 5                                             |                                                       |
| 3. State the research question(s)/hypotheses                                                                                                  | 5 & 6                                         |                                                       |
| 4. Identify the specific case(s) and justify the selection                                                                                    |                                               |                                                       |
| <b>Describing the data collection</b>                                                                                                         |                                               |                                                       |
| 5. Describe how data were collected                                                                                                           | 6 & 7                                         |                                                       |
| 6. Describe the sources of evidence used                                                                                                      | 6 & 7                                         |                                                       |
| 7. Describe any ethical considerations and obtainment of relevant approvals, access and permissions                                           | 7                                             |                                                       |
| <b>Describing the data analysis</b>                                                                                                           |                                               |                                                       |
| 8. Describe the analysis methods                                                                                                              | 7                                             |                                                       |
| <b>Interpreting the results</b>                                                                                                               |                                               |                                                       |
| 9. Describe any inherent shortcomings in the design and analysis and how these might have influenced the findings                             | 17                                            |                                                       |
| 10. Consider the appropriateness of methods used for the question and subject matter and why it was that qualitative methods were appropriate | 16 & 17                                       |                                                       |
| 11. Discuss the data analysis                                                                                                                 | 16 & 17                                       |                                                       |
| 12. Ensure that the assertions are sound, neither over- nor under-interpreting the data                                                       | 17                                            |                                                       |
| 13. State any caveats about the study                                                                                                         | 17                                            |                                                       |

From: Chapter 5, Translating high-consensus Delphi items into reporting standards for organisational case studies Developing a methodological framework for organisational case studies: a rapid review and consensus development process. Health Services and Delivery Research, No. 4.1. Rodgers M, Thomas S, Harden M, et al. Southampton (UK): [NIHR Journals Library](#); 2016 Jan

## Supplementary material 2

**Topics guides for semi-structured interviews****Topic guide for senior managers and clinicians**

## Topic areas

- Confirm the person's job role
- Ask them to describe their involvement with physician associate employment in the hospital to date
- Ask questions on the factors supporting the adoption of the employment of physician associates
- Ask questions on the factors inhibiting the employment of physician associates
- Questions on their views of physician associates' impact on (ask for examples):
  - Organisation of services
  - Patient experience and outcomes
  - Other staff
  - Costs
- Anything else they would like to say?

**Interviewer to probe** on all answers to ensure the meaning is clear (e.g. that is an interesting point , can you explain a bit more about it ) and check for understanding (e.g. so can I check I have understood you correctly ).....

**Interviewer to check** for any routine management reports or data or evaluations that the hospital team would be willing to share with the researchers.

Thank them and ask if they would like to receive updates on the study and a final summary of the findings. If so could they please give contact details which will be kept separate from the interview data?

---

## Topic guide for physician associate interviews

### Topic areas

- Ask them to describe how long they have been a physician associate, how many posts, type and length as a physician associate
- Ask them to describe the work they undertake, with what type of medical/surgical team
- Ask about their supervising doctor and arrangements when they are not there
- Ask questions on their views of the factors supporting the adoption of the employment of physician associate in their experience
- Ask questions on their views of the factors inhibiting the employment of physician associate in their experience
- Ask how they have been received in the hospital as a new type of health professional?
- Ask how they explain to patients, family and staff – who they are and what a physician associate is
  
- Questions on their views of their, or other physician associates, impact on (ask for examples):
  - Organisation of services
  - Patient experience and outcomes
  - Other staff
  - Costs
  
- Anything else they would like to say?

**Interviewer to probe** on all answers to ensure the meaning is clear (e.g that is an interesting point , can you explain a bit more about it) and check for understanding (e.g. so can I check I have understood you correctly ).....

**Interviewer to check** for any routine management reports or data or evaluations that the hospital team would be willing to share with the researchers .

Thank them and ask if they would like to receive updates on the study and a final summary of the findings. If so could they please give contact details which will be kept separate from the interview data?

---

## Topic guide for all other types of professionals/managers interviews

### Topic areas

- Confirm the person's job role
- Ask them to describe their involvement with physician associate employment in the hospital to date
- Ask questions on their views of any factors supporting the adoption of the employment of physician associates in their experience
- Ask questions on their views of any factors inhibiting the employment of physician associates in their experience
- Ask their views as to how the PAs have been received in that service/team, and probe for any explanations
- Questions on their views of physician associates' impact on (ask for examples):
  - Organisation of services
  - Boundaries between the job roles of different types of professionals e.g. with nurses
  - Patient experience and outcomes
  - Other staff
  - Costs
- Anything else they would like to say?

**Interviewer to probe** on all answers to ensure the meaning is clear (e.g. that is an interesting point , can you explain a bit more about it ) and check for understanding (e.g. so can I check I have understood you correctly ).....

**Interviewer to check** for any routine management reports or data or evaluations that the hospital team would be willing to share with the researchers.

Thank them and ask if they would like to receive updates on the study and a final summary of the findings. If so could they please give contact details which will be kept separate from the interview data?

---



## Topic guide for patient interviews

### Topic areas

- Confirm the person is/has been a patient
- Ask them to outline the type of care they have been in receipt of without giving personal medical details e.g. in patient for x days
- Confirm the patient has met the physician associate
- Explore what sort of involvement the physician associate has had with them
- Ask them how they understand the role of the physician associate in the medical/surgical team
- Ask them how they found receiving care from a physician associate
- If they were to need similar medical or surgical care, would they be content to receive similar care from a physician associate in the future as they had this time (and can they explain why) or would they prefer someone different? And if yes, can they explain why?
- Anything else they would like to say?

**Interviewer to probe** on all answers to ensure the meaning is clear (e.g. that is an interesting point , can you explain a bit more about it) and check for understanding (e.g. so can I check I have understood you correctly).

Thank them and ask if they would like to receive updates on the study and a final summary of the findings. If so could they please give contact details which will be kept separate from the interview data?
