# Supplementary material for: What is the contribution of physician associates in hospital care in England? A mixed methods, multiple case study
Source: PubMed Central journal article supplement (PMC6359738; doi:10.1136/bmjopen-2018-027012), 2019-01-30
Supplement: bmjopen-2018-027012supp001.pdf [file bmjopen-2018-027012supp001.pdf]

Supplementary file 1

Consensus standards for the reporting of organisational case studies

| <b>Reporting item</b>                                                                                                                         | <b>Page number on which item was reported</b> | <b>Page number of justification for not reporting</b> |
|-----------------------------------------------------------------------------------------------------------------------------------------------|-----------------------------------------------|-------------------------------------------------------|
| <b>Describing the design</b>                                                                                                                  |                                               |                                                       |
| 1. Define the research as a case study                                                                                                        | 6                                             |                                                       |
| 2. State the broad aims of the study                                                                                                          | 5                                             |                                                       |
| 3. State the research question(s)/hypotheses                                                                                                  | 5 & 6                                         |                                                       |
| 4. Identify the specific case(s) and justify the selection                                                                                    |                                               |                                                       |
| <b>Describing the data collection</b>                                                                                                         |                                               |                                                       |
| 5. Describe how data were collected                                                                                                           | 6 & 7                                         |                                                       |
| 6. Describe the sources of evidence used                                                                                                      | 6 & 7                                         |                                                       |
| 7. Describe any ethical considerations and obtainment of relevant approvals, access and permissions                                           | 7                                             |                                                       |
| <b>Describing the data analysis</b>                                                                                                           |                                               |                                                       |
| 8. Describe the analysis methods                                                                                                              | 7                                             |                                                       |
| <b>Interpreting the results</b>                                                                                                               |                                               |                                                       |
| 9. Describe any inherent shortcomings in the design and analysis and how these might have influenced the findings                             | 17                                            |                                                       |
| 10. Consider the appropriateness of methods used for the question and subject matter and why it was that qualitative methods were appropriate | 16 & 17                                       |                                                       |
| 11. Discuss the data analysis                                                                                                                 | 16 & 17                                       |                                                       |
| 12. Ensure that the assertions are sound, neither over- nor under-interpreting the data                                                       | 17                                            |                                                       |
| 13. State any caveats about the study                                                                                                         | 17                                            |                                                       |

From: Chapter 5, Translating high-consensus Delphi items into reporting standards for organisational case studies Developing a methodological framework for organisational case studies: a rapid review and consensus development process. Health Services and Delivery Research, No. 4.1. Rodgers M, Thomas S, Harden M, et al. Southampton (UK): [NIHR Journals Library](#); 2016 Jan
